1 **A global pangenome for the wheat fungal pathogen**  
2 ***Pyrenophora tritici-repentis* and prediction of effector**  
3 **protein structural homology**

4

5 Paula Moolhuijzen<sup>1\*</sup>, Pao Theen See<sup>1</sup>, Gongjun Shi<sup>2</sup>, Harold R. Powell<sup>3</sup>, James  
6 Cockram<sup>4</sup>, Lise N. Jørgensen<sup>5</sup>, Hamida Benslimane<sup>6</sup>, Stephen E. Strelkov<sup>7</sup>, Judith  
7 Turner<sup>8</sup>, Zhaohui Liu<sup>2\*</sup> and Caroline S. Moffat<sup>1</sup>

8

9 <sup>1</sup> Centre for Crop Disease and Management, School of Molecular and Life Sciences,  
10 Curtin University, Bentley, Western Australia, Australia

11 <sup>2</sup> Department of Plant Pathology, North Dakota State University, Fargo, North  
12 Dakota, USA

13 <sup>3</sup> Department of Life Sciences, Centre for Integrative Systems Biology and  
14 Bioinformatics, Imperial College London, London, England, United Kingdom

15 <sup>4</sup> NIAB, 93 Lawrence Weaver Road, Cambridge, CB3 0LE, United Kingdom

16 <sup>5</sup> Department of Agroecology, Aarhus University, Slagelse, Denmark

17 <sup>6</sup> Département de Botanique, Ecole Nationale Supérieure Agronomique (ENSA),  
18 Hassan Badi, El-Harrach, Algiers, Algeria

19 <sup>7</sup> Department of Agricultural, Food and Nutritional Science, University of Alberta,  
20 Edmonton, AB, Canada

21 <sup>8</sup> Fera Science Ltd., York, YO41 1LZ, United Kingdom

22

23 \* Correspondence: Zhaohui Liu, [zh.liu@ndsu.edu](mailto:zh.liu@ndsu.edu) \* Correspondence: Paula

24 Moolhuijzen, [Paula.Moolhuijzen@curtin.edu.au](mailto:Paula.Moolhuijzen@curtin.edu.au)

25

26 Keywords: Necrotrophic fungi, plant pathogen, toxin

27 Repositories: The sequenced genomes have been deposited in the

28 DDBJ/ENA/GenBank under accession numbers JAAFOX000000000,

29 JAHCSW000000000, JAHCYZ000000000, NRDI02000000, PSOO00000000-

30 PSOU00000000 and RXHK00000000-RXHN00000000.

## 31 **Abstract**

32 The adaptive potential of plant fungal pathogens is largely governed by the gene  
33 content of a species, comprised of core and ancillary genes across the pathogen isolate  
34 repertoire. To approximate the complete gene repertoire of a globally significant crop  
35 fungal pathogen, a pan genomic analysis was undertaken for *Pyrenophora tritici-*  
36 *repentis* (Ptr), the causal agent of tan (or yellow) spot disease in wheat.

37 In this study, fifteen new Ptr genomes were sequenced, assembled and annotated,  
38 including isolates from three races not previously sequenced. Together with eleven  
39 previously published Ptr genomes, a pangenome for twenty-six Ptr isolates from  
40 Australia, Europe, North Africa and America, representing nearly all known races,  
41 revealed a conserved core-gene content of 56% and presents a new Ptr resource for  
42 searching natural homologues using remote protein structural homology. Here, we  
43 identify for the first time a nonsynonymous mutation in the Ptr effector gene *ToxB*,  
44 multiple copies of *tox**b*, a distant natural *Pyrenophora* homologue of a known  
45 *Parastagonopora nodorum* effector, and clear genomic break points for the *ToxA*  
46 effector horizontal transfer region.

47 This comprehensive genomic analysis of Ptr races includes nine isolates sequenced  
48 via long read technologies. Accordingly, these resources provide a more complete  
49 representation of the species, and serve as a resource to monitor variations potentially  
50 involved in pathogenicity.

51

## 52 **Author Notes**

53 All supporting data, code and protocols have been provided within the article or  
54 through supplementary data files. Five supplementary data files and fifteen  
55 supplementary figures are available with the online version of this article.

## 56 **Impact Statement**

57 Our *Pyrenophora tritici-repentis* (Ptr) pangenome study provides resources and  
58 analyses for the identification of pathogen virulence factors, of high importance to  
59 microbial research. Key findings include: 1) Analysis of eleven new sequenced (with  
60 three new races not previously available) and previously published isolates, 26  
61 genomes in total, representing the near complete Ptr race set for known effector  
62 production collected from Australia, Europe, North Africa and the Americas. 2) We  
63 show that although Ptr has low core gene conservation, the whole genome divergence  
64 of other wheat pathogens was greater. 3) The new PacBio sequenced genomes  
65 provide unambiguous genomic break points for the large *ToxA* effector horizontal  
66 transfer region, which is only present in *ToxA* producing races. 4) A new web-based  
67 Ptr resource for searching *in silico* remote protein structural homology is presented,  
68 and a distant natural *Pyrenophora* protein homologue of a known effector from  
69 another wheat pathogen is identified for the first time.

70

## 71 **Data Summary**

72 The sources and genomic sequences used throughout this study have been deposited  
73 in the National Centre for Biotechnology Information (NCBI), under the assembly  
74 accession numbers provided in Tables 1 and 2 (available in the online version of this

75 article). The new M4 resource for protein structural homology is freely available  
76 through the BackPhyre web-portal URL, <http://www.sbg.bio.ic.ac.uk/phyre2/>.

## 77 **Introduction**

78 Tan (or yellow) spot, caused by the necrotrophic fungal pathogen *Pyrenophora tritici-*  
79 *repentis* [(Died.) Drechs.] (abbreviated to Ptr), can occur on both bread wheat  
80 (*Triticum aestivum* L.) and durum wheat (*T. turgidum* subsp. *durum* L.). A globally  
81 significant disease of economic importance (Murray GM and Brennan JP 2009,  
82 Benslimane, Lamari et al. 2011), tan spot can reduce crop production with up to 31%  
83 yield losses reported (Bhathal, Loughman et al. 2003).  
84 During infection, necrotrophic fungi secrete necrotrophic effectors (NEs) that interact  
85 with the corresponding sensitivity genes in the host wheat lines (Friesen, Zhang et al.  
86 2008, Ciuffetti, Manning et al. 2010, Faris, Liu et al. 2013, Downie, Lin et al. 2021).  
87 To date, Ptr has three known NEs, Ptr ToxA, Ptr ToxB and Ptr ToxC that produce  
88 either necrosis or chlorosis symptoms on their sensitive wheat genotypes (Ciuffetti,  
89 Tuori et al. 1997, Strelkov, Lamari et al. 1999). It is the different combinations (and  
90 absence) of these NEs that have been used to define different Ptr races (Lamari and  
91 Strelkov 2010, Faris, Liu et al. 2013), including race 1 (Ptr ToxA and Ptr ToxC), race  
92 2 (Ptr ToxA), race 3 (Ptr ToxC), race 4 (no Ptr ToxA, Ptr ToxB or Ptr ToxC), race 5  
93 (Ptr ToxB), race 6 (Ptr ToxB and Ptr ToxC), race 7 (Ptr ToxA and Ptr ToxB) and race  
94 8 (Ptr ToxA, Ptr ToxB and Ptr ToxC). However, there are reports of isolates beyond  
95 the current classification (Ali S, Gurung S et al. 2010, Benslimane, Lamari et al.  
96 2011, Kamel, Cherif et al. 2019). AR CrossB10 from North Dakota, USA, was such  
97 an isolate that produces both Ptr ToxC with an unknown effector, which has been  
98 recently sequenced (Kariyawasam, Wyatt et al. 2021) and will subsequently be

99 referred to here as “race unknown” (Moolhuijzen, See et al. 2018). In addition to the  
100 three known effectors, the presence of novel NEs has been suggested in several  
101 studies (Tuori, Wolpert et al. 1995, Andrie, Pandelova et al. 2007, Ali S, Gurung S et  
102 al. 2010, Rybak, See et al. 2017, See, Marathamuthu et al. 2018). These findings  
103 make the sequencing of new isolates a priority to capture and understand the complete  
104 gene repertoire for Ptr.

105 Genome sequencing projects for fungal pathogens using single molecule long reads,  
106 such as PacBio and Oxford Nanopore technologies, have significantly improved our  
107 understanding of pathogen genomes, as they allow near complete genome assembly.  
108 In particular, the wheat fungal pathogens *Fusarium graminearum* (cause of fusarium  
109 head blight), Ptr, *Parastagonospora nodrum* (Sn, cause of Septoria nodorum blotch)  
110 and *Zymoseptoria tritici* (Zt, cause of Septoria tritici blotch) are known to have highly  
111 variable genomes characterised by gene loss and duplication events as well as large-  
112 scale genome rearrangements (Manning, Pandelova et al. 2013, Richards, Wyatt et al.  
113 2017, Moolhuijzen, See et al. 2018, Badet, Oggenfuss et al. 2020, Alouane, Rimbart  
114 et al. 2021, Bertazzoni, Jones et al. 2021). To understand the genome composition of  
115 a species, the protein-coding genes from all available isolates are clustered based on  
116 the sequence identity of conserved protein domains into core (genes shared by all  
117 isolates) and ancillary/accessory (genes absent in one or more isolates) groups. The  
118 union of the core and accessory groups for the collection of isolates is then referred to  
119 as the pangenome, which is larger than the genome of any one individual (Vernikos,  
120 Medini et al. 2015). Depending on the number of sequenced isolates, associations to  
121 distinct habitats and phenotypes may then be detected within a pathogen species  
122 (Vernikos, Medini et al. 2015).

123 In this study, fifteen new Ptr isolates collected from Europe (Denmark, Germany and  
124 the United Kingdom ), North Africa (Algeria and Tunisia) and the Americas (Brazil,  
125 Canada and the USA) were sequenced, assembled and annotated, for comparative  
126 analysis with eleven previously published Australian and North American Ptr isolates  
127 (Manning, Pandelova et al. 2013, Moolhuijzen, See et al. 2018, Moolhuijzen, See et  
128 al. 2019). A total of 26 annotated Ptr genomes, which represent nearly all known Ptr  
129 races, are presented here for a pangenome analysis to determine whole genome  
130 phylogeny and sequence variations in relation to core and ancillary genes. Ptr proteins  
131 are then further explored *in silico* to identify remote natural structural homology  
132 between different necrotrophic fungal species (not acquired by a horizontal gene  
133 transfer).

## 134 **Materials and methods**

### 135 **Isolate collection and DNA extraction**

136 Ptr isolates were collected from Algeria (Alg130 and Alg215), Brazil (Biotrigo9-1),  
137 Canada (90-2), Denmark (EW306-2-1, EW4-4, and EW7m1), Germany (SN001A,  
138 SN001C and SN002B), USA (86-124 and Ls13-192), United Kingdom (CC142) and  
139 Tunisia (T199 and T205). All isolates were collected from bread wheat (*T. aestivum*  
140 L.), except Alg215 which was collected from durum wheat (*T. turgidum* subsp. *durum*  
141 L.). Fungi were grown on V8-PDA agar according to (Moffat, See et al. 2014).  
142 Genomic DNA was extracted using a BioSprint 15 DNA Plant Kit (Qiagen, Hilden,  
143 Germany) with some modifications. Briefly, DNA was extracted using the BioSprint  
144 15 automated workstation, according to the manufacturer's instructions, from 3-day  
145 old mycelia grown in Fries 3 medium (Moffat, See et al. 2014). DNA was further  
146 treated with 50 µg/ml of RNase enzyme (Qiagen, Hilden, Germany) for 1 h followed

147 by phenol/chloroform extraction, precipitation with sodium acetate and ethanol, and  
148 finally resuspension in Tris-EDTA buffer.

### 149 **Isolate pathotyping**

150 Ptr isolates were pathotyped for race classification through infection assays of  
151 differential wheat genotypes differing in their specific effector sensitivities. The  
152 wheat genotypes used were Glenlea (Ptr ToxA-sensitive), 6B662 (Ptr ToxB-  
153 sensitive), 6B365 (Ptr ToxC-sensitive) and Auburn or Salamouni (insensitive to all  
154 three effectors).

155 Two-week-old wheat (*T. aestivum* L.) seedlings were inoculated by spraying conidia  
156 onto the whole plants evenly at a rate of 3,000 conidia/ml and grown at 20 °C under a  
157 12-h day/night cycle in a controlled growth chamber (Moffat, See et al. 2014). The  
158 second leaves were harvested 7-days post-inoculation, visually inspected for  
159 symptoms (Lamari, Sayoud et al. 1995) and photographed. The inoculation  
160 experiments were repeated twice with three replicate plants per wheat genotype.

### 161 **Ptr isolate sequencing and genome assembly**

162 Genomic DNA from four Ptr isolates was sequenced using the PacBio Sequel system,  
163 90-2 (Novogene, China), Biotrigo9-1 (Novogene, USA), Ls13-192 and 86-124 (Mayo  
164 Clinic, Minnesota, USA). Error correction and *de novo* genome assembly of PacBio  
165 reads was completed with Canu version v2.1.1 (Koren, Walenz et al. 2017) with the  
166 following options (genomeSize=43, useGrid=TRUE, maxThreads=28,  
167 merylThreads=28, ovlThreads=28 ovlMerThreshold=500 and  
168 gridOptionsOBTOVL="--cpus-per-task=28) on computer resources (Broadwell Intel  
169 Xeon cores, 100 Gb/s Omni-Path interconnect and 128GB of memory per compute  
170 node) at Pawsey Supercomputing Centre, Perth, Western Australia. Previously



171 generated Illumina 150 bp paired end DNA sequence reads of 86-124 genomic DNA  
172 (Moolhuijzen, See et al. 2018) and Biotrigo9-1 Illumina sequence (this study) were  
173 aligned to the contigs using BWA V0.7.17-r1188 (Li H and Durbin R 2009), and the  
174 sorted alignment bam files then used for further base error corrections using Pilon  
175 v1.24 (Walker, Abeel et al. 2014).

176 The genomic DNA for an additional 11 Ptr isolates (EW306-2-1, EW4-4, and  
177 EW7m1, SN001A, SN001C, SN002B, CC142, Alg130, Alg215, T199 and T205) was  
178 sequenced using Illumina Hi-Seq 150 bp pair-end reads by the Australian Genome  
179 Research Facility (AGRF). Isolate sequence data was quality checked with FASTQC  
180 (Andrews 2011), trimmed for poor quality, ambiguous bases and adapters using  
181 Skewer (Jiang, Lei et al. 2014) and Trimmomatic v0.22 (Bolger, Lohse et al. 2014)  
182 with a read head crop of 6 bp and minimum length of 100 bp. *De novo* genome  
183 assembly was undertaken using SPAdes version v3.10.0 (Bankevich, Nurk et al.  
184 2012).

### 185 **Gene prediction and functional annotation**

186 Ptr sequenced genomes were soft masked for low complexity, as well as known  
187 transposable elements, using RepeatMasker (RM) (Chen 2004) v. open-4.0.6 with  
188 rmblastn version 2.2.27+ on RepBase (Kohany O, Gentles AJ et al. 2006) RM  
189 database version 20150807 (taxon=fungi). *Ab-initio* gene predictions were made with  
190 GeneMark-ES v4.33 (--ES --fungus --cores 16) (Borodovsky and Lomsadze 2011)  
191 and CodingQuarry v1.2 Pathogen Mode (PM) (Testa, Hane et al. 2015), assisted by  
192 RNA-Seq (Moolhuijzen, See et al. 2018) genome alignments using TopHat2 (Kim  
193 and Salzberg 2011) for a minimum intron size of 10 bp. The Ptr M4 and Pt-1C-BFP  
194 reference proteins (Manning, Pandelova et al. 2013, Moolhuijzen, See et al. 2018)  
195 were aligned using Exonerate v2.2.0 (--minintron 10 --maxintron 3000)

196 protein2genome mode (Slater and Birney 2005). Gene annotations were assigned  
197 from BLASTX (v2.2.26) (Shiryev, Papadopoulos et al. 2007) searches against  
198 Uniref90 (Oct 13, 2020), NCBI Refseq (taxon=Pezizomycotina) (Oct 13, 2020) and  
199 InterProScan v5.17-56 (Quevillon, Silventoinen et al. 2005) protein databases.  
200 Sequence domains were assigned by RPS-BLAST (v2.2.26) against Pfam v33.1,  
201 Smart v6.0 and CDD v3.19 databases. The blast protein and domain searches were  
202 then summarised using AutoFACT v3.4 (Koski LB, Gray MW et al. 2005).  
203 Proteins were screened for a signal peptide using SignalP v5.0b (Petersen TN, Brunak  
204 S et al. 2011). Effector predictions were conducted on proteins with signal peptides  
205 using EffectorP v3.0 (Sperschneider, Dodds et al. 2018, Sperschneider and Dodds  
206 2021). To ensure the same prediction methods were used for comparative analyses,  
207 SignalP V5.0b and EffectorP v3.0 (Sperschneider, Dodds et al. 2018, Sperschneider  
208 and Dodds 2021) were used to update the effector gene predictions on all the publicly  
209 available isolate genomes (Supplementary data 1). All predicted proteins were also  
210 ranked using Predictor v1.1 (Jones, Rozano et al. 2021) (Supplementary data 1).  
211 Gene completeness was accessed using BUSCO v3, lineage fungi (Seppey, Manni et  
212 al. 2019).

### 213 **Comparative genomics**

214 To conduct comparative analyses across the Class Ascomycota, publicly available  
215 isolate genomes were downloaded from the National Centre for Biotechnology  
216 Information (NCBI) GenBank. These included *Bipolaris* (*B. cookei*, *B. maydis*, *B.*  
217 *sorokiniana*, *B. zeicola*), *Leptosphaeria* (*L. maculans*), *Parastagonospora* (*P.*  
218 *nodorum*), *Pyrenophora* (*Pyrenophora teres* f. *teres*, *Pyrenophora teres* f. *maculata*,  
219 *Pyrenophora serminiperda*) and *Zymoseptoria* (*Z. tritici*) (Syme, Tan et al. 2016,

220 McDonald, Ahren et al. 2017, Richards, Wyatt et al. 2017, Syme, Martin et al. 2018,  
221 Badet, Oggenfuss et al. 2020) (Supplementary data 2). The published genomes of *P.*  
222 *tritici-repentis* isolates Pt-1C-BFP, DW5, DW7, SD20 (Manning, Pandelova et al.  
223 2013), Ptr134, Ptr239, Ptr11137, Ptr5213, M4, 86-124 (Moolhuijzen, See et al. 2018),  
224 AR CrossB10 (Kariyawasam, Wyatt et al. 2021) and V1 (Moolhuijzen, See et al.  
225 2019) were also included for analysis.

226 Genome nucleotide pairwise distance was calculated with Phylonium v1.5 (Klotzl and  
227 Haubold 2020) with two-pass enabled and 100 bootstrap matrices. Whole genome  
228 phylogenetic trees were constructed using Phylip 1:3.695-1 (Retief 2000), consensus  
229 program v3.695 on 100 Kitsch and neighbour joining v3.695 trees. The tree was then  
230 visualised using FigTree v1.4.4. Genomic nucleotide regions were compared between  
231 isolates using NUCmer v3.1 (Delcher, Salzberg et al. 2003) and Easyfig v 2.2.3  
232 (Sullivan, Petty et al. 2011).

233 To determine the presence, copy number and percent identity of all genes in Ptr, the  
234 gene nucleotide sequences from all 26 isolates were aligned to all 26 genomes using  
235 GMAP version 2021-05-27 with options “-f 2 -t 48 -n 300 --max-intronlength-  
236 middle=1000 --max-intronlength-ends=1000 --fulllength --trim-end-exons=0 --alt-  
237 start-codons --canonical-mode=1 -- --max-deletionlength=20”. Isolate mRNA  
238 Pearson correlations and predicted effector protein lengths and scores were analysed  
239 using R v4.0.3 (Team” 2021) using the R packages corrplot v0.84, ggplot2 v3.3.3,  
240 ggridges v0.5.3 and pheatmap v1.0.12. The analysis and data are available in  
241 v1.3.1093 RStudio (RStudio-Team 2020) markdown notebook  
242 <https://github.com/ccdmb/PTR-60>.

243 Isolate reads were aligned to the isolate M4 reference genome using BWA 0.7.14-  
244 r1138 and coverage (10 kb windows) was calculated using BedTools (genomecov)

245 v2.17.0 on SamTools v 0.1.19-96b5f2294a sorted bam files. Regions of absence were  
246 then plotted using Circos v0.69-3 and R v3.5.1, bioconductor package chromPlot  
247 v1.10.0.

## 248 **Protein orthologous clustering and effector analysis**

249 Predicted protein data for all available Ptr isolates were clustered using OrthoFinder  
250 v2.5.2 (Emms and Kelly 2015). The predicted effector groups (with signal peptides)  
251 were then screened for three-dimensional (3-D) protein model predictions using the  
252 Protein Homology/analogY Recognition Engine V 2.0 Phyre2 (Kelley, Mezulis et al.  
253 2015) batch processing mode. The predicted models were superimposed on the best  
254 ranked template to find the largest subset of atoms within an approximate threshold of  
255 3.5 Å, which was adjusted based on the size of the aligned proteins using iMol  
256 (Rotkiewicz 2007). Protein sequences with high confidence (Phyre<sup>2</sup> ≥ 90%) predicted  
257 3-D protein models were also searched against the Plant Host Interactions database  
258 (PHI-base) of known pathogenic phenotypes (Urban, Cuzick et al. 2017), at an  
259 expected value threshold of ≤ 1e-10 for significant alignments. Hidden Markov  
260 Model (HMM) libraries were created for the whole genome of Ptr isolate M4, which  
261 has been made publicly available through the online resource BackPhyre, Imperial  
262 College, London (Kelley, Mezulis et al. 2015).

## 263 **Results**

### 264 **PacBio genome sequencing, assembly and annotation of four *P. tritici-***

#### 265 ***repentis* isolates**

266 A total of four Ptr genomes comprising two race 4 (lack all three known Ptr effectors)  
267 isolates (North Dakota (USA) isolate Ls13-192 (Guo, Shi et al. 2020) and Canadian  
268 isolate 90-2 (Lamari, Gilbert et al. 1998)), and two race 2 (producing Ptr ToxA only)

269 isolates (Brazilian isolate Biotrigo9-1 (Bertagnolli, Ferreira et al. 2019) and Canadian  
270 isolate 86-124 (Lamari and Bernier 1989)) were sequenced using PacBio technology,  
271 assembled and protein-coding genes were predicted for comparative analysis.  
272 The assembled Ptr genomes ranged in size from 37.56 Mb to 42.19 Mb (Table 1) and  
273 of these, the known effector producing isolates (86-124 and Biotrigo9-1) had a size  
274 comparable to previously PacBio sequenced genomes (M4 and DW5) (Moolhuijzen,  
275 See et al. 2018, Moolhuijzen, See et al. 2020). The race 4 isolate not producing  
276 known effectors, Ls13-192, had the smallest genome size at 37.56 Mb, at least 2 Mb  
277 smaller than all the known effector-producing isolate genomes, but similar to Pt-1C-  
278 BFP which was sequenced prior to the availability of third generation long read  
279 technologies and which lacks some representation of repeat/complex genomic regions  
280 (Manning, Pandelova et al. 2013). Our four new assemblies were more fragmented  
281 than the previously assembled genomes M4 and DW5 (Moolhuijzen, See et al. 2018,  
282 Moolhuijzen, See et al. 2020). In particular race 4 isolate 90-2 was fragmented into  
283 162 contigs, over twice as many contigs as compared to race 2 isolate Biotrigo9-1 and  
284 race 4 isolate Ls13-192. The four genome assemblies had a BUSCO quantitative  
285 assessment greater than 98.9% for completeness with respect to gene content  
286 (Supplementary Fig. S1).  
287 The number of predicted protein-encoding genes for our new PacBio sequenced  
288 genome assemblies ranged from 12,816 (Ls13-192) to 14,394 (Biotrigo9-1) (Table 1).  
289 The number of predicted protein effectors for race 2 isolates 86-124 and Biotrigo9-1  
290 and race 4 isolate Ls13-192 was lower than the numbers predicted for race 1 isolate  
291 M4 and race 5 isolate DW5. However, race 4 isolate 90-2 had the highest number of  
292 proteins predicted as effectors, due to a higher gene copy number identified later in  
293 the protein clustering analysis. Furthermore, in the race 4 isolates a single *tox*b (found

294 in non-pathogenic Ptr isolates and having no toxic activity (Kim and Strelkov 2007,  
 295 Figueroa Betts, Manning et al. 2011) was detected in Ls13-192 on contig 4 (113,627-  
 296 113,893 bp) and an exact *tox*b duplication event was detected in 90-2 on contig 37  
 297 (termed here *tox*b1, 15,199-15,465 bp) and on contig 42 (termed *tox*b2, 15,135-15,401  
 298 bp). The *tox*b genes appeared close to a contig end. Ls13-192 contig 4 and 90-2  
 299 contigs 37 and 42 have contig assembly sizes 3,110,128 Mb, 116 kb and 87 kb,  
 300 respectively. No *tox*b gene coding region, protein or nucleotide sequence variations  
 301 were identified (Supplementary Fig. S2 and S3). *ToxA* was identified in race 2 isolates  
 302 86-124 (contig 17, 764,135-764,722 bp) and Biotrigo9-1 (contig 7, 1,370,173-  
 303 1,370,760 bp), no gene coding region, nucleotide or protein sequence variations were  
 304 found. The Ptr-specific hairpin element (PtrHp1) *ToxA* 3'UTR insertion previously  
 305 identified (Moolhuijzen, See et al. 2018) was not detected in the *ToxA* 3'UTR region  
 306 of these genomes.

307 The four new assembled and annotated genomes Ls13-192, 86-124, 90-2 and  
 308 Biotrigo9-1 have been deposited in NCBI GenBank and can be found under accession  
 309 numbers JAHCSW000000000, NRDI02000000, JAAFOX000000000 and  
 310 JAHCYZ000000000, respectively.

311

312 Table 1. Summary statistics for our four PacBio sequenced Ptr genome assemblies,  
 313 compared with those of two previously published Ptr assemblies.

|                   | <b>86-124</b> | <b>Biotrigo9-1</b> | <b>Ls13-192</b> | <b>90-2</b> | <b>*M4</b> | <b>*DW5</b> |
|-------------------|---------------|--------------------|-----------------|-------------|------------|-------------|
| Race              | 2             | 2                  | 4               | 4           | 1          | 5           |
| Known effector    | A             | A                  | -               | -           | AC         | B           |
| Source            | Canada        | Brazil             | USA             | Canada      | Australia  | USA         |
| GenBank accession | NRDI02        | JAHCYZO            | JAHCSW0         | JAAFOX0     | NQIK00     | MUXC02      |
| Number of contigs | 139           | 75                 | 72              | 162         | 50         | 60          |

|                                  |               |              |              |              |              |              |
|----------------------------------|---------------|--------------|--------------|--------------|--------------|--------------|
| Total contigs length (Mb)        | 41.15         | 42.19        | 37.56        | 39.71        | 40.92        | 40.87        |
| Mean contig size (kb)            | 296.04        | 562.57       | 521.68       | 245.18       | 998.09       | 681.19       |
| Median contig size (bp)          | 23,098        | 34,534       | 32,389       | 20,792       | 32,745       | 31,213       |
| Longest contig (Mb)              | 3.92          | 10.08        | 7.54         | 7.30         | 9.91         | 8.11         |
| Shortest contig (bp)             | 3,180         | 8,676        | 1,765        | 2,050        | 3,304        | 2,843        |
| <sup>a</sup> Contigs > 10 kb     | 113 (81.29 %) | 74 (98.67 %) | 69 (95.83 %) | 52 (93.3 %)  | 38 (92.68 %) | 39 (65.00 %) |
| <sup>a</sup> Contigs > 100 kb    | 41 (29.50 %)  | 18 (24.00 %) | 18 (25.00 %) | 39 (24.07 %) | 11 (26.83 %) | 17 (28.33 %) |
| <sup>a</sup> Contigs > 1 Mb      | 14 (10.07 %)  | 12 (16.00 %) | 12 (16.67 %) | 9 (5.56 %)   | 10 (24.39 %) | 12 (20.00 %) |
| N50                              | 1,684,023     | 3,177,932    | 2,530,800    | 1,794,835    | 3,658,030    | 3,133,851    |
| L50                              | 9             | 5            | 5            | 5            | 4            | 5            |
| N80                              | 623,938       | 1,969,426    | 1,691,594    | 567,608      | 2,765,034    | 2,129,786    |
| L80                              | 17            | 10           | 10           | 17           | 8            | 10           |
| Genes                            | 14,158        | 14,394       | 12,816       | 14,227       | 15,459       | 14,276       |
| Total protein (aa) length (Mb)   | 6.81          | 6.97         | 5.95         | 5.85         | 6.90         | 5.95         |
| <sup>b</sup> Predicted effectors | 178 (1.2%)    | 169 (1.1%)   | 189 (1.4%)   | 380 (2.6%)   | 291(1.8%)    | 314 (2.1%)   |

314 \*Previously published in NCBI GenBank. <sup>a</sup> Percentage of contigs over the displayed length is shown in  
315 brackets. <sup>b</sup> EffectorP V3 predictions  $\geq 0.7$ , the percentage of genes predicted an effector is shown in  
316 brackets. N50 and N80 is the sequence length of the shortest contig at 50% and 80% of the total  
317 genome length. L50 and L80 is the count of smallest number of contigs whose length sum makes up  
318 50% and 80% of the genome size, respectively.

319

320 **Illumina genome sequencing, assembly and annotation of eleven *P. tritici-***  
321 ***repentis* isolates**

322 Whole genome Illumina sequencing and assembly was then undertaken for eleven  
323 new *Ptr* genomes comprised of isolates from Denmark (EW306-2-1, EW4-4 and  
324 EW7m1), Germany (SN001A, SN001C and SN002B), United Kingdom (CC142),

325 Algeria (Alg130 and Alg215) and Tunisia (T199 and T205). The assembled Ptr  
326 genomes ranged in size from 34.15 Mb to 35.18 Mb (Table 2), comparable to  
327 previous Illumina Ptr isolate assembly sizes (Moolhuijzen, See et al. 2018).

328 The number of predicted protein-encoding genes ranged between 12,237 to 12,539 for  
329 the assembled genomes. Of these, 279 to 300 effectors were predicted with a  
330 probability score  $\geq 0.7$ . *ToxA* was identified in isolates T199, Alg215, CC142,  
331 EW3061-2-1, EW4-4, SN001C and SN001B, and *ToxB* was identified in the Alg130  
332 genome. *ToxA* and *ToxB* were both detected in T199 and Alg215 genomes, however,  
333 the Alg215 *ToxB* sequence was partial (due to a sequence inversion in the 5' end of  
334 the gene), truncated by 33 amino acid residues in the protein N-terminus which  
335 includes the encoded signal peptide (amino acid positions 1 to 22) (Supplementary  
336 Fig. S4). Furthermore, a single nonsynonymous substitution (I > R, residue position  
337 17) was detected. Neither *ToxA* or *ToxB* were detected in isolates EW7m1, SN001A  
338 and T205.

339 The Ptr-specific hairpin element (PtrHp1) *ToxA* 3' UTR insertion previously  
340 identified in isolates EW306-2-1 and EW4-4 (Moolhuijzen, See et al. 2018) was also  
341 detected in *ToxA* 3' UTR for our United Kingdom isolate CC142, but not in the  
342 remaining North African *ToxA* isolates T199 and Alg215 (Table 2).

343 The plant infection assays on the wheat differential lines confirmed CC142, EW306-  
344 2-1 and EW4-4 as race 1 isolates (producing ToxA and ToxC), EW7m1 and SN001A  
345 as race 3 isolates (producing ToxC), Alg130 as a race 5 isolate (producing ToxB),  
346 T199 as a race 7 isolate (producing ToxA and ToxB) and T205 as a race 4 isolate (no  
347 ToxA, ToxB or ToxC production) (Supplementary Fig. S5 and S6). Due to the  
348 truncated *ToxB* gene in isolate Alg215 and a weaker chlorosis phenotype on the ToxB  
349 wheat differential lines, Alg215 has been provisionally classified as a race 8 isolate



350 (producing *ToxA*, *ToxB* and *ToxC*) (Table 2). The SN001C and SN002B isolates  
351 could not be tested for race classification because the colonies sporulated poorly;  
352 nonetheless, *ToxA* was present and *ToxB* was absent in the genome sequence for both  
353 isolates. As *ToxC* production in SN001C and SN002B remains unknown, they could  
354 be race 1 or 2.

355 All the assembled and annotated genomes have been deposited in NCBI GenBank and  
356 can be found under accession numbers PSOO00000000-PSOU00000000 and  
357 RXHK00000000-RXHN00000000.

358 Table 2. Illumina sequenced genome assemblies of 11 new *Ptr* isolates. Table shows isolate source, race and *de novo* assembly statistics.

| Isolate                      | CC142          | EW306-2-1  | EW4-4      | EW7m1    | SN001A   | SN001C            | SN002B            | Alg130      | T199         | T205        | Alg215                        |
|------------------------------|----------------|------------|------------|----------|----------|-------------------|-------------------|-------------|--------------|-------------|-------------------------------|
| <b>GenBank accession</b>     | PSOU0000       | PSOT0000   | PSOS0000   | PSOR0000 | PSOQ0000 | PSOP0000          | PSOO0000          | RXHN0000000 | RXHM0000000  | RXHL0000000 | RXHK00000000                  |
| <b>Source</b>                | United Kingdom | Denmark    | Denmark    | Denmark  | Germany  | Germany           | Germany           | Algeria     | Tunisia      | Tunisia     | Algeria                       |
| <b>Year collected</b>        | -              | 2015       | 2015       | 2015     | 2016     | 2016              | 2016              | 2016        | 2016         | 2016        | 2015                          |
| <b>Race</b>                  | 1              | 1          | 1          | 3        | 3        | n.d.              | n.d.              | 5           | 7            | 4           | *8                            |
| <b>Known effectors</b>       | ToxA, ToxC     | ToxA, ToxC | ToxA, ToxC | ToxC     | ToxC     | <sup>b</sup> ToxA | <sup>b</sup> ToxA | ToxB        | ToxA, ToxB   | None        | ToxA, <sup>c</sup> ToxB, ToxC |
| <b>Locus ID</b>              | 10965          | 03130      | 05320      | -        | -        | 12604             | 05700             | 11547       | 11003; 11565 |             | 05415                         |
| <b>ToxA-PtrHp1 Contigs</b>   | Present        | Absent     | Present    | Absent   | Absent   | Present           | Absent            | Absent      | Absent       | Absent      | Absent                        |
| <b>Total length (Mb)</b>     | 2,398          | 2,592      | 2,355      | 2,409    | 2,369    | 2,487             | 2,956             | 3,748       | 3,609        | 3,314       | 3,374                         |
| <b>Mean contig size</b>      | 34.34          | 34.54      | 34.37      | 34.23    | 34.15    | 34.30             | 35.16             | 35.18       | 34.68        | 34.43       | 34.87                         |
| <b>Longest contig</b>        | 14,323         | 13,326     | 14,595     | 14,210   | 14,417   | 13,791            | 11,895            | 9,388       | 9,610        | 10,390      | 10,335                        |
| <b>N50</b>                   | 205,419        | 291,678    | 233,712    | 233,813  | 258,315  | 188,750           | 233,762           | 272,310     | 309,714      | 272,252     | 342,897                       |
| <b>L50</b>                   | 47,343         | 48,368     | 48,593     | 48,975   | 49,129   | 45,477            | 48,749            | 52,525      | 54,960       | 53,235      | 62,752                        |
| <b>Genes</b>                 | 213            | 202        | 206        | 199      | 202      | 221               | 216               | 189         | 176          | 181         | 160                           |
| <b>Total CDS length (Mb)</b> | 12,347         | 12,499     | 12,323     | 12,429   | 12,311   | 12,392            | 12,472            | 12,475      | 12,358       | 12,237      | 12,539                        |
|                              | 15.73          | 15.79      | 15.72      | 15.67    | 15.63    | 15.7              | 15.76             | 16.27       | 16.18        | 16.11       | 16.37                         |

|                               |         |         |         |         |         |         |         |         |         |         |         |
|-------------------------------|---------|---------|---------|---------|---------|---------|---------|---------|---------|---------|---------|
| <sup>d</sup> <b>Predicted</b> | 279     | 289     | 287     | 284     | 281     | 287     | 291     | 300     | 297     | 286     | 291     |
| <b>Effectors</b>              | (2.26%) | (2.31%) | (2.33%) | (2.28%) | (2.28%) | (2.32%) | (2.33%) | (2.40%) | (2.40%) | (2.34%) | (2.32%) |

359 <sup>a</sup>Provisionally assigned as race 8. <sup>b</sup>Not determined; colonies were not viable for spore production. <sup>c</sup>Partial sequence that is truncated and contains a

360 synonymous SNP, <sup>d</sup>EffectorP3.0 score  $\geq 0.7$ , the percentage of genes predicted an effector is shown in brackets.

## 361 **Whole genome comparative analyses**

362 Whole genome phylogenetic analysis of the 26 Ptr isolates, sourced from the major  
363 wheat growing regions in the Americas, Australia, Europe and North Africa (Fig. 1A),  
364 showed distinct clades for European and North African geographic locations (Fig.  
365 1B). Surprisingly, isolate Alg215 from North Africa did not cluster with the  
366 remaining North African isolates. On genome alignment to the reference genome of  
367 isolate M4, a large 1 Mb distal region on M4 contig 1 and many smaller regions were  
368 absent in Alg130, T199 and T205 but present in Alg215 (Supplementary Fig. S7).  
369 Furthermore, branches for race 4 (that do not produce ToxA, ToxB or ToxC) isolates  
370 (SD20, 90-2 and Ls13-192) had the greatest phylogenetic distances from the known  
371 effector producing isolate groups, while race 4 T205 and SD20 (both Illumina  
372 sequence) did not cluster. In particular, isolates SD20 (USA) and 90-2 (Canada) were  
373 more distant than the isolate Ls13-192 (USA).

374 Whole genome phylogenetic analysis of Ptr and related ascomycete fungal species  
375 clustered into four distinct clades for *Bipolaris* spp., *P. nodorum*, *P. tritici-repentis*  
376 and *P. teres* (Fig. 1C). A lower phylogenetic divergence within the individual  
377 *Pyrenophora* species (Ptm, Ptr and Ptt) was observed as compared with Bs, Pn and Zt  
378 isolates (Supplementary Fig. S8).

379 To observe regions of absence across the assembled genomes, regions  $\geq 10$  kb absent  
380 for the Ptr isolates were plotted against the reference M4 genome (Fig. 1D). The large  
381 horizontal transferred region for ToxA on chr6 was present in all ToxA producing  
382 isolates and absent in ToxA non-producing isolates. For the previously reported large  
383 Ptr ToxA horizontal transfer region, believed to have come from *P. nodorum* (Friesen,  
384 Stukenbrock et al. 2006, Manning, Pandelova et al. 2013, Moolhuijzen, See et al.  
385 2018), clear break points on M4 chr6 at the 1,645,874 bp and 1,774,022 bp positions

386 (128 kb insertion) could be determined between isolates producing and not producing  
387 ToxA (Fig. 1D and Supplementary Fig. S9). The flanking regions of the breakpoints  
388 were highly conserved between the all aligned isolates (Supplementary Fig. S9). A  
389 region on chr1 near the 1.47 Mb position was found absent in all non-ToxC producing  
390 isolates and the unknown race (ToxC producing) when only looking at long read  
391 assemblies (Fig 1D and Supplementary Fig. S10 (plot on left hand side)). The race 4  
392 isolates had more regions of absence, particularly in the distal ends of chromosome 2.  
393 A greater number of absent regions were obtained for Illumina sequenced assemblies  
394 (Supplementary Fig. S10, plot on right hand side). Regions of variation appear mostly  
395 associated with chromosome telomeres and centromeres. In particular, the distal  
396 region on M4 chr10 the equivalent of race 5 isolate DW5 chr11 (1,752,563-2,152,826  
397 bp) was mostly unique as compared with races 1, 2, 4 and the unknown race, with  
398 fragmented alignments dispersed throughout the last 100 kb of the chromosome  
399 surrounding *Ptr ToxB2* (2,152,563-2,152,826 bp) (Supplementary Fig. S11).

400

401

402 Fig. 1. Whole genome analysis of *Ptr* isolates. A) Geographic source and number of  
403 *Ptr* isolates currently available and analysed. Legend shows the number of isolates. B)  
404 Whole genome phylogenetic tree of *Ptr* isolates from Illumina sequencing (Alg130,  
405 T199, T205, Alg215, CC142, EW306-2-1, EW4-4, EW7m1, DW7, Pt-1C-BFP,  
406 Ptr239, Ptr11137, Ptr5213, SD20, SN001A, SN001C, SN002B), PacBio Technologies  
407 (86-124, 90-2, AR CrossB10, Biotrigo9-1, DW5, Ls13-192, M4 and V1) and Oxford  
408 Nanopore Technologies (Ptr134). The unrooted neighbour joining phylogenetic tree  
409 displays clades for the European (violet) and North Africa (tan) isolates. Geographic  
410 source of the other isolates are Australian (blue), USA (green), Canada (red) and

411 Brazil (purple). The race 4 isolates (Ls13-192, 90-2 and SD20) have the greatest  
412 distance from the clade of known effector producing isolates. C) Unrooted Neighbour  
413 joining phylogenetic tree for Ptr (purple clade), *Pyrenophora teres* (*P. teres* f.  
414 *maculata* (Ptm) and *P. teres* f. *teres* (Ptt)) (orange clade), *Bipolaris* (*B. sorokiniana*  
415 (Bs1-3 and Q7399), *B. maydis* (Bm-ATCC and Bm-C5) and *Bipolaris zeicola* (Bz)  
416 (green clade), *Parastagonospora nodorum* (Sn4, Sn15 and Sn79) (yellow clade),  
417 *Leptosphaeria maculans* (Lm) and *Zymoseptoria tritici* (Zt) isolates. The branches for  
418 race 4 isolates not producing known effectors (Ls13-192, 90-2 and SD20) are  
419 highlighted (blue) within the Ptr clade. D) Circular plots show 10 kb regions of  
420 absence plotted for the Ptr isolates genomes sequenced using long-read technologies  
421 (PacBio and Oxford Nanopore Technology) as compared with the chromosomes of  
422 the reference Ptr genome of isolate M4. Isolates are coloured by race. Three regions  
423 of interest are highlighted in grey and zoomed at 20x for chromosome 2 and  
424 chromosome 1, and 40x for chromosome 9.

425

#### 426 ***P. tritici-repentis* mRNA sequence alignment to whole genomes**

427 To ensure a comprehensive search of Ptr genes in the pangenome, predicted mRNA  
428 sequences from all isolates were aligned to all the genomes at greater than 90%  
429 sequence identity and 90% coverage. The number of alignments and greatest percent  
430 identity for each locus were recorded to determine isolate correlations (Fig. 2).  
431 Although a closer correlation by gene percent sequence identity could be determined  
432 for isolates that were Illumina or PacBio sequenced, a distinct grouping for Alg130,  
433 T199 and T205, and a grouping of the European isolates, was evident. Furthermore,  
434 the race 4 isolates 90-2 and SD20 were less correlated to all the remaining isolates  
435 (Fig 2A). Based on gene counts (copy number) three distinct groups were observed,

436 for long read-sequenced, European Illumina-sequenced and Australian/North-  
437 African/North-American Illumina-sequenced isolates (Fig 2B). However, the three  
438 race 4 isolates (Ls13-192, 90-2 and SD20) were outliers.

439

440 Fig. 2. Ptr pangenome predicted mRNA correlation plots for gene sequence  
441 percentage identity (A) and gene copy number (B). Ptr isolates from Illumina  
442 sequencing (Alg130, T199, T205, Alg215, CC142, EW306-2-1, EW4-4, EW7m1,  
443 DW7, Pt-1C-BFP, Ptr239, Ptr11137, Ptr5213, SD20, SN001A, SN001C, SN002B),  
444 PacBio Technologies (86-124 (Ptr86-124), 90-2 (Ptr90-2), AR CrossB10, Biotrigo9-1,  
445 DW5, Ls13-192, M4 and V1) and Oxford Nanopore Technologies (Ptr134).

446

447 All genes were then filtered for presence/absence variation between ToxC-producing  
448 isolates [race 1 (Pt-1C-BFP, CC142, EW4\_4 and EW306-2-1), race 3 (EW7m1 and  
449 SN001A), race unknown (AR CrossB10) and provisional race 8 (Alg215)] and non-  
450 ToxC producing isolates [race 2 (86-124 and Biorigo9-1), race 4 (T205, Ls13-192,  
451 90-2 and SD20), race 5 (DW5 and DW7) and race 7 (T199)] to identify genes that  
452 may be related to ToxC production. When only PacBio sequenced genomes were  
453 queried, a gene cluster of 16 genes from isolate M4 mRNAs 12743 to 12761 (proteins  
454 KAF7566087-KAF7566105) positioned on M4 chromosome 9 within 101,367 -  
455 138,426 bp and 14 single loci genes outside of the cluster were found present in the  
456 ToxC producing races (races 1 and unknown) and absent in races not producing ToxC  
457 (races 2, 4 and 5) (Supplementary Fig. S12). The region was however absent for the  
458 race 1 Oxford Nanopore technology (ONT)-sequenced isolate Ptr134 (Fig. 1D). None  
459 of the 30 genes found to be specific to ToxC-producing isolates (based on PacBio  
460 technology) had an identified signal peptide or appeared to be part of any predicted

461 biosynthetic gene cluster (Table 3 and Supplementary data 3). A search of the  
462 pathogen-host interaction database PHI-base (Urban, Cuzick et al. 2017), which  
463 provides expertly curated molecular and biological information on genes proven to  
464 affect the outcome of pathogen-host interactions, did however identify four proteins  
465 with significant alignments to proteins with classified reduced virulence and lethal  
466 phenotypes. The following proteins with reduced virulence phenotype were described  
467 as being an indoleacetamide hydrolase (iaaH) involved in auxin biosynthesis and  
468 plant hormone metabolism (P06618) in *Pseudomonas savastanoi*, a Non-Ribosomal  
469 Protein Synthase (NRPS) (A0A024CHY2) in *Pseudomonas cichorii* and an AMP  
470 binding protein (E3QPY3) in *Colletotrichum graminicola*. The protein IIRXA5,  
471 classified with a lethal phenotype in *F. graminearum*, appears to be a transcription  
472 factor (homeobox).  
473



474 Table 3. Ptr predicted mRNA sequences identified specific to ToxC-producing isolates (Pacbio sequenced) and PHI-base results.

| <b>M4<br/>GenBank<br/>accession</b> | <b>Chr.</b> | <b>Strand</b> | <b>Gene position</b> | <b>M4 mRNA</b> | <b>Protein ID</b>       | <b>Description</b>                                             | <b>Length<br/>(aa)</b> | <b>PHI base ID</b>         | <b>Expected<br/>value</b> |
|-------------------------------------|-------------|---------------|----------------------|----------------|-------------------------|----------------------------------------------------------------|------------------------|----------------------------|---------------------------|
| CM025795                            | Chr1        | +             | 4192655-4193250      | mRNA_1649      | KAF7577409              | hypothetical<br>protein                                        | 161                    |                            |                           |
| CM025796                            | Chr2        | -             | 5052985-5053659      | mRNA_5712      | <sup>c</sup> KAF7575752 | hypothetical<br>protein                                        | 224                    |                            |                           |
| CM025797                            | Chr3        | +             | 94019-97874          | mRNA_5765      | KAF7572524              | transmembrane<br>Dimer-Tnp-hAT<br>domain containing<br>protein | 1104                   | <sup>a</sup><br>A0A024CHY2 | 6.00E-18                  |
| CM025797                            | Chr3        | +             | 104828-106828        | mRNA_5768      | KAF7572527              | hypothetical<br>protein                                        | 666                    | <sup>a</sup> E3QPY3        | 2.00E-56                  |
| CM025797                            | Chr3        | -             | 1062456-1062785      | mRNA_6121      | KAF7572880              | hypothetical<br>protein                                        | 109                    |                            |                           |
| CM025797                            | Chr3        | +             | 1234950-1235279      | mRNA_6173      | KAF7572932              | hypothetical<br>protein                                        | 109                    |                            |                           |
| CM025799                            | Chr5        | +             | 1432573-1432928      | mRNA_8853      | KAF7570515              | hypothetical<br>protein                                        | 99                     |                            |                           |
| CM025799                            | Chr5        | +             | 1504991-1506668      | mRNA_8883      | KAF7570545              | hypothetical<br>protein                                        | 518                    |                            |                           |
| CM025799                            | Chr5        | +             | 3350956..3351804     | mRNA_9590      | KAF7571252              | DDE-3 multi-<br>domain protein                                 | 282                    | <sup>b</sup> I1RXA5        | 1.00E-55                  |
| CM025800                            | Chr6        | -             | 157070-158024        | mRNA_9652      | KAF7568901              | hypothetical<br>protein                                        | 260                    |                            |                           |
| CM025800                            | Chr6        | -             | 227855-229037        | mRNA_9675      | KAF7568924              | hypothetical<br>protein                                        | 292                    |                            |                           |
| CM025800                            | Chr6        | +             | 536251-538210        | mRNA_9782      | <sup>c</sup> KAF7569031 | Amidase domain<br>containing protein                           | 535                    | <sup>a</sup> P06618        | 1.00E-14                  |
| CM025800                            | Chr6        | +             | 1257276-1261804      | mRNA_10029     | KAF7569278              | hypothetical                                                   | 1489                   |                            |                           |

|          |      |   |                |            |                         |                                 |     |
|----------|------|---|----------------|------------|-------------------------|---------------------------------|-----|
| CM025803 | Chr9 | - | 101367-102082  | mRNA_12743 | KAF7566087              | protein<br>hypothetical         | 166 |
| CM025803 | Chr9 | + | 103558-104538  | mRNA_12744 | KAF7566088              | protein<br>hypothetical         | 326 |
| CM025803 | Chr9 | - | 108927-109433  | mRNA_12746 | <sup>d</sup> KAF7566090 | protein<br>hypothetical         | 153 |
| CM025803 | Chr9 | - | 109617-109871  | mRNA_12747 | <sup>d</sup> KAF7566091 | protein<br>hypothetical         | 84  |
| CM025803 | Chr9 | - | 112305-113390  | mRNA_12748 | <sup>d</sup> KAF7566092 | protein<br>hypothetical         | 346 |
| CM025803 | Chr9 | + | 114593-114844  | mRNA_12749 | <sup>d</sup> KAF7566093 | protein<br>hypothetical         | 83  |
| CM025803 | Chr9 | - | 115206-116625  | mRNA_12750 | <sup>d</sup> KAF7566094 | protein<br>hypothetical         | 454 |
| CM025803 | Chr9 | + | 117388-118112  | mRNA_12751 | <sup>d</sup> KAF7566095 | protein<br>hypothetical         | 225 |
| CM025803 | Chr9 | + | 118451..119788 | mRNA_12752 | <sup>d</sup> KAF7566096 | protein<br>hypothetical         | 445 |
| CM025803 | Chr9 | - | 120249-121379  | mRNA_12753 | KAF7566097              | Methyltransf-18<br>multi-domain | 376 |
| CM025803 | Chr9 | + | 125936-126175  | mRNA_12755 | <sup>d</sup> KAF7566099 | protein<br>hypothetical         | 60  |
| CM025803 | Chr9 | - | 127211-127757  | mRNA_12756 | KAF7566100              | protein<br>hypothetical         | 159 |
| CM025803 | Chr9 | + | 128397-131000  | mRNA_12757 | KAF7566101              | Cwf-Cwc-15<br>domain containing | 867 |
| CM025803 | Chr9 | - | 131128-131483  | mRNA_12758 | KAF7566102              | protein<br>hypothetical         | 99  |
| CM025803 | Chr9 | - | 134706-135131  | mRNA_12759 | <sup>d</sup> KAF7566103 | protein<br>hypothetical         | 91  |

|          |       |   |                 |            |              |                                    |     |
|----------|-------|---|-----------------|------------|--------------|------------------------------------|-----|
| CM025803 | Chr9  | - | 137602-138426   | mRNA_12761 | KAF7566105   | protein<br>hypothetical<br>protein | 274 |
| CM025804 | Chr10 | - | 2199594-2200463 | mRNA_14375 | KAF7565231.1 | hypothetical<br>protein            | 265 |

475 PHI-base phenotype classifications <sup>a</sup>reduced virulence, <sup>b</sup>lethal. <sup>c</sup>M4 mRNA *in planta*. <sup>d</sup>M4 mRNA *in vitro*.

476

477

478 The genes specific for ToxC-producing isolates (that were PacBio-sequenced) were  
479 also searched in previous published *in planta* and *in vitro* RNA-seq data  
480 (Moolhuijzen, See et al. 2018) and most of the gene cluster (KAF7566087-  
481 KAF7566105) had *in vitro* transcription support (Supplementary Fig. S13). Only the  
482 hypothetical transmembrane protein (KAF7575752), amidase containing protein  
483 (KAF7569031) and two other hypothetical proteins had *in planta* transcription  
484 support during Ptr infection (Table 3).

485 When all sequenced isolates were considered, only a single locus for a transmembrane  
486 protein, an integral membrane component, was identified core to all ToxC-producing  
487 isolates, represented by the M4 protein (KAF7575752) on chromosome 2 position  
488 5,052,985-5,053,659 bp (Fig. 1D). This gene was recently identified as *ToxC1*, a gene  
489 required but not sufficient for ToxC production in Ptr (Shi, Kariyawasam et al. 2022).  
490 A less stringent search for *ToxC1* in all isolates detected the presence of *ToxC1* in the  
491 race 2 isolate Biotrigo9-1 genome, which was disrupted by a large insertion of 5,348  
492 bp, positioned at 45,946 to 51,292 bp on contig 12, which disrupted the *ToxC1* protein  
493 coding region in the 582-583 bp position. Examination of the 2 kb gene flanking  
494 regions of all genomes indicated a further large insertion downstream of the gene in  
495 Biotrigo9-1 (Fig. 3). The two large insertions do not have a similar sequence identity,  
496 with the insertion downstream of *ToxC1* carrying Gypsy retrotransposon transposable  
497 elements (TEs) and the *ToxC1* insertion carrying Copia retrotransposon TE informed  
498 by flanking long terminal repeats (LTRs) (Supplementary Fig. S14).

499

500 Fig. 3. Ptr isolate M4 *ToxC1* locus and 2 kb flanking sequence region alignment to  
501 twelve other Ptr ToxC producing isolates. The Biotrigo9-1 *ToxC1* region has two

502 large insertions within and downstream of *ToxC1*. Nucleotide sequence alignments  
503 (blue) between the *ToxC1* region for Ptr isolates (top to bottom M4, AR CrossB10,  
504 Biotrigo9-1, Pt-1C-BFP, V1, Ptr134, Alg215, CC142, EW306-2-1, EW7m1,  
505 SN0001A, SN0001C and SN0002B) (black lines). The M4 genes are shown as red  
506 arrows. The light blue alignment segments are regions of low identity among the  
507 isolates, while the crossed regions indicate a repeat region in each sequence.

### 508 **Analyses of core and ancillary gene sets / protein clusters**

509 To determine core and ancillary protein groups in Ptr, a total of 335,037 predicted  
510 protein coding genes from this study and published genomes downloaded from NCBI  
511 (see Material and Methods) were clustered. Out of the total number, 331,581 proteins  
512 clustered into 14,960 orthologous groups and 3,456 singletons, representing a  
513 pangenome for Ptr. A total of 8,509 groups were core (56%) (with all isolates present)  
514 and 7,170 orthogroups (47%) consisted entirely of single-copy genes (Supplementary  
515 data 4). Overall, for the PacBio sequenced isolates, race 4 isolate 90-2 had a low  
516 percentage of single copy genes (78%) (higher percentage of gene duplications),  
517 similar to M4 (76%) (Supplementary data 4). The percentage of single copy genes for  
518 the PacBio sequenced genomes ranged from 76% for M4 to 95% for AR CrossB10.

519 Across the Ptr pangenome (core and ancillary genes), 32,257 (9.6%) genes had a  
520 signal peptide of which just over one third (11,911 genes) were predicted to be  
521 effectors (EffectorP 3.0 default probability score  $\geq 0.5$ ). The EffectorP 3.0 effector  
522 probability scores for *ToxA* and *ToxB* were 0.702 and 0.93, respectively. The  
523 effectors *ToxA* and *ToxB/toxB* were identified in orthologous protein groups  
524 OG0011421 and OG0011851, respectively.

525 All predicted effectors protein sequences were then clustered into 738 orthogroups, of  
526 which five groups were isolate specific (containing paralogous genes) and 187 were

527 singletons (a single gene). Of the 738 effector orthogroups, only 119 (16%) were core  
528 to all isolates and of the core orthogroups 25 orthogroups (21%) had 100% sequence  
529 identity. Of the non-core effector groups, 62 orthogroups were absent in the race 4  
530 isolates T205, Ls13-192, 90-2 and SD20.

531 A comparison of predicted effectors from orthogroups with race 4 absent to those  
532 with race 4 present found that the average protein length was shorter (T-test,  
533 Wilcoxon adj. *P-value* 2.9e-294) and the effector probability scores were higher (T-  
534 test, Wilcoxon adj. *P-value* 1.8-28) (Supplementary Fig. S15).

### 535 **Protein tertiary structure analysis of predicted effectors**

536 To identify protein tertiary structure homology, predicted effectors were screened  
537 using remote homology detection methods against known protein structures to build  
538 3-D models. Of these, 147 proteins had predicted high confidence tertiary models  
539 based on published tertiary protein structures (Phyre2 confidence  $\geq 90\%$  and  
540 alignment coverage  $\geq 90\%$ ) (Supplementary data 5). Of the high confidence proteins,  
541 a total of 48 and 19 had annotated hydrolase and binding functions, respectively. Five  
542 were annotated as effectors, which included Ptr ToxA necrosis effector  
543 (KAF7569451) with 100% sequence identity to the Protein Database (PDB) crystal  
544 protein structure of ToxA 1ZLD and four elicitor proteins, hrip2 (KAF7578077,  
545 KAF7575054, KAF7570798 and KAF757229) based on the crystal structure from  
546 *Magnaphorthe oryzae* (PDB 5FID) with sequence identities ranging between 23 -  
547 26%.

548 The 147 predicted effector proteins with a confident protein tertiary model were then  
549 searched against Phi-Base (Urban, Cuzick et al. 2017). A total of 34 proteins had  
550 known Phi-Base pathogenicity or reduced virulence hits, of which 11 were plant  
551 avirulence determinants, which included ToxA (Supplementary data 5).

552 To enable the capture of genes that may have been filtered out previously (that may  
553 not have a predicted signal peptide), whole genome HMM libraries of M4 were  
554 generated for screening using BackPhyre (Kelley, Mezulis et al. 2015). Effector  
555 related protein structures were then selected from toxins available in the RCSB PDB  
556 for Ptr ToxB (2MM0), toxb (2MM2), ToxA (1ZLD) and SnTox3 (6WES) to identify  
557 any other structural homologues and orthologues, respectively. No structural  
558 paralogues for ToxA or ToxB were identified in isolate M4 (with confidence levels  $\geq$   
559 20.0); however, an orthologous structure was identified for SnTox3 with 58%  
560 alignment coverage (46 - 138 amino acids) to M4 (protein accession KAF7577476)  
561 (104 - 195 amino acids in the alignment) with a confidence score of 95.5 and 34%  
562 protein sequence identity (Fig. 4A). This indicated a high confidence that the match  
563 between KAF7577476 and the PnTox3 template is a true homology that adopts the  
564 overall protein fold and that the core protein is modelled at a high accuracy (2-4  $\text{\AA}$   
565 from the native, true structure). The 3-D protein structures for SnTox3 (Fig. 4B) and  
566 predicted structure for KAF7577476 (Fig. 4C) were then structurally aligned and  
567 superimposed with a root mean square distance (RMSD) of 1.14  $\text{\AA}$  (Fig. 4D).

568

569 Fig. 4. The predicted protein sequence and structural alignments of SnTox3 and the  
570 isolate M4 protein KAF7577476. A) Multiple protein sequence alignment of SnTox3,  
571 Ptt CAA9973983.1 (W1-1), Ptm CAA9957881.1 (SG1) and Ptr KAF7577476 (M4).  
572 The Kex2 motif conservation is shown boxed in red. Only four cysteine residues were  
573 conserved across the four species (black asterisks) and those not conserved (red  
574 asterisks) are shown below the alignment for *P. nodorum* and above for the  
575 *Pyrenophora* spp. B) The known 3-D protein structure for SnTox3 (PDB 6WES). C)  
576 The 3-D structure for KAF7577476 as predicted by Phyre2. D) Superimposed

577 structural alignment (yellow) of SnTox3 and KAF7577476 with an RSDM of 1.14  
578 A°.

579

580 A TBLASTN sequence search of the M4 isolate predicted protein KAF7577476  
581 against all the Ptr genomes found evidence that the gene encoding this predicted  
582 protein is present in all isolates. The KAF7577476 protein sequence was then also  
583 searched against the genomes of the related barley necrotrophic fungal pathogens *P.*  
584 *teres f. teres* isolate W1-1 (Ptt) and *P. teres f. maculata* isolate SG1 (Ptm) (Syme,  
585 Martin et al. 2018) and high identity orthologues were also identified: CAA9973983.1  
586 (isolate W1-1) and CAA9957881.1 (isolate SG1), respectively (Fig. 4A). An  
587 automated and combinative method for ranking top candidate effector proteins  
588 (Predector) (Jones, Rozano et al. 2021) ranked Ptr KAF7577476 in the 262th position,  
589 Ptt CAA9973983 as the top candidate (number one) and Ptm CAA9957881 in the 56<sup>th</sup>  
590 position with Predector scores of 1.9, 3.9 and 2.7, respectively (Supplementary data  
591 S1). The SnKex2 cleavage motif LSKR (69 - 72 amino acids) of SnTox3 (Outram,  
592 Solomon et al. 2021) aligned to AKEL protein residues in the three *Pyrenophora* spp.  
593 (Ptr, Ptm and Ptt), where the residue positioned before the cleavage site (P1) is  
594 expected to be exclusively an arginine (Arg, R) (Outram, Solomon et al. 2021) (Fig.  
595 4A). Furthermore, the *Pyrenophora* sequences appeared to possess only 4 of the 6  
596 cysteine residues, that form three disulphide bonds (Osborn 2010), conserved with  
597 SnTox3. The predicted apoplastic effector scores for SnTox3, KAF7577476 (Ptr),  
598 CAA9973983 (Ptt) and CAA9957881 (Ptm) were 0.573, 0.572, 0.691 and 0.765,  
599 respectively.



## 600 **Discussion**

### 601 ***P. tritici-repentis* pangenome analysis**

602 In this study, we present the pangenome of 26 Ptr isolates with a near complete  
603 representation of the eight known race categories. Our 15 newly assembled and  
604 annotated genomes, along with the 11 previously published genomes, represent a  
605 global pangenome of Ptr for major wheat growing regions, with close and distant  
606 proximity to the origin of wheat domestication in the Fertile Crescent of western Asia.  
607 The repertoire of the known Ptr genes (Moolhuijzen, See et al. 2018) was expanded  
608 by 31%, represented by 18,416 non-redundant sequences. This expansion of genes is  
609 also observed in other plant fungal species, where a pangenome analysis of 20 *F.*  
610 *graminearum* isolates resulted in a 32% gene expansion over the reference isolate  
611 (Alouane, Rimbert et al. 2021). The 56% conservation of core orthogroups in Ptr  
612 identified here is similar in magnitude to a recent 19 isolate pangenome analysis of  
613 the wheat pathogen *Z. tritici* (Badet, Oggenfuss et al. 2020), which found 60% of  
614 gene orthogroups were core.

615 A number of Ascomycete genomes, such as Pn, Ptt and Zt, have ‘two speed  
616 genomes’, where the genome is compartmentalised into gene-poor AT-rich regions  
617 and can have accessory chromosomes. In contrast, Ptr does not appear to have  
618 accessory chromosomes and has a GC-equilibrated genome (Dong, Raffaele et al.  
619 2015, Testa, Oliver et al. 2016, Bertazzoni, Williams et al. 2018, Moolhuijzen, See et  
620 al. 2018, Syme, Martin et al. 2018). The whole genome phylogenetic analysis clearly  
621 showed greater isolate phylogenetic distances within Bs, Pn and Zt isolates as  
622 compared with the *Pyrenophora* spp. (Ptm, Ptr and Ptt). However, even with  
623 comparatively low phylogenetic distances within Ptr, distinct clades could be detected  
624 based on geographic locations. The only exception was isolate Alg215 from Algeria,

625 which clustered with the Australian and American isolates, sharing a large sub-  
626 telomeric region in common. This sequence variation, plus a disrupted *ToxB*, set  
627 Alg215 apart from the other isolates collected from North Africa. Despite the low  
628 whole-genome phylogenetic distances in *Ptr*, a lower percentage of core orthogroups  
629 (56%) was found compared with a previous analyses of 11 isolates (PacBio and  
630 Illumina sequenced), which indicated 69% core orthologous groups (Moolhuijzen,  
631 See et al. 2018). This suggests that not only has the pangenome complexity risen with  
632 an increase in the numbers of isolates sequenced (as expected), but that an increased  
633 divergence in *Ptr* conserved protein domains is apparent.

634 Although in this analysis only a single gene was identified as specific to all ToxC  
635 producing isolates (*ToxC1*), PacBio sequencing identified a potential gene cluster of  
636 interest which would be near impossible to identify in Illumina-sequenced genomes,  
637 due to the repetitive nature of the region. Interestingly, our analysis found no putative  
638 effectors that were core to all isolates, again indicating a large variability within *Ptr*  
639 for this type of gene. Recently, *ToxC1* was functionally validated using a gene  
640 knockout approach (Shi, Kariyawasam et al. 2022), where it was found to be required,  
641 but not sufficient, for ToxC production. In our study, no clear gene cluster for a  
642 secondary metabolite or Ribosomally synthesized and post-translationally modified  
643 peptides (RiPPs) was identified, in part due to the positioning of the *ToxC* locus  
644 within the complex subtelomeric region of chromosome 2 (Shi, Kariyawasam et al.  
645 2022), which despite long read sequencing still remains a problematic region to  
646 resolve. The presence of *ToxC1* in a non-ToxC producing isolate (Biotrigo9-1) was  
647 surprising, and raises more questions regarding the evolution and/or origin of ToxC  
648 production. It is possible that the large *ToxC1* insertion by a LTR retrotransposon has

649 disrupted the production of ToxC in Biotrigo9-1 and that those remaining gene(s)  
650 involved in ToxC production are present.

651 The divergence of Ptr race 4 isolates (that do not produce the known effectors on  
652 wheat) from isolates that produce known effectors was clearly shown, except for  
653 T205. The genome sizes and gene duplication rates of the two race 4 isolates (Ls13-  
654 192 and 90-2) also revealed a complexity that was unexpected. Race 4 was first  
655 described 30 years ago (Lamari and Bernier 1989, Lamari and Bernier 1991) as a nec-  
656 chl pathotype (avirulent) on the set of differential wheat lines, and has since been  
657 reported but not as frequently as the other races from collections of Ptr across  
658 different wheat growing regions. A recent study by Guo et al. (2020) showed that  
659 despite the inability of race 4 isolates to induce tan spot symptoms on the differential  
660 wheat lines, four race 4 isolates (Ls13-14, Ls13-86, Ls13-192 and Ls13-198) from  
661 North Dakota in the USA induced varying degrees of disease reactions upon  
662 inoculation on tetraploid (durum) wheats (Guo, Shi et al. 2020). This may well  
663 provide an explanation for the observed distinction of Ls13-192 from the other race 4  
664 isolates (90-2 and SD20) in the whole genome phylogenetic clustering and gene  
665 correlation analyses, since unlike Ls13-192, SD20 and 90-2 have not been reported to  
666 be virulent on durum wheat. Furthermore, as *ToxA* and *ToxB* were absent, race 4  
667 isolate T205 is unlike the new virulence type that lacked *ToxA* and *ToxB* gene  
668 expression on bread wheat differentials but produced necrosis in durum wheat  
669 (Benslimane 2018).

670 While it was unexpected that a race 4 isolate (90-2) had the highest percentage of  
671 genes predicted as effectors, this appeared to be the result of a genome-wide  
672 expansion of gene copies (which included predicted effectors). It is possible that

673 although the predicted effectors in race 4 isolates may have not have a pathogenic role  
674 in bread wheat, they may play a role in another system.

675 We report, for the first time, an identical *tox*b (non-toxic homologue of *ToxB*) copy in  
676 a race 4 genome (2 genes in 90-2). As each *tox*b are on separate contigs, it is not  
677 possible to identify if they are co-located. We can, however, speculate that based on  
678 the difficulty in assembling the *tox*b regions, they may lie in a subtelomeric  
679 chromosome location similar to the multicopy *ToxB*, which was shown to be nested in  
680 the complex subtelomeric chromosomal regions of the DW5 genome (Moolhuijzen,  
681 See et al. 2020). It is increasingly believed that effector genes are located in  
682 transposon-rich and gene-sparse subtelomeric regions of the pathogen genome,  
683 allowing opportunity for gene duplication events and thereby contributing to the  
684 evolution of virulence diversity. We also show no conservation between the different  
685 races for the *ToxB* locus or flanking regions. The sequence variation in the  
686 chromosomal centromeric and telomeric regions shown in our whole genome  
687 alignments, indicates that these regions are indeed hot spots for diversity. It is  
688 furthermore interesting that one of the North Africa isolates (Alg 215) had a truncated  
689 *ToxB* gene with a nonsynonymous mutation within the coding region, which may  
690 have resulted in a weak chlorosis phenotype on the wheat differential lines. We  
691 believe that this is the first report of a *ToxB* nonsynonymous mutation in Ptr. The  
692 large *ToxA* horizontal transfer region previously identified (Manning, Pandelova et al.  
693 2013, Moolhuijzen, See et al. 2018) was shown to be absent in all non-ToxA  
694 producing isolates and clear insertion breakpoints were identified in all ToxA  
695 producing isolates.

696 In this study, a pangenome approach was undertaken to approximate the complete  
697 gene repertoire of the species to capture all gene variations (percentage identity and  
698 copy number) and identify candidate genes specific for ToxC-producing races.

### 699 **A new *Pyrenophora* resource to identify protein structural homologues**

700 Pathogenic fungi possess large effector repertoires that are dominated by hundreds of  
701 small secreted proteins only related by protein tertiary structures (3-D structure) (de  
702 Guillen, Ortiz-Vallejo et al. 2015). The prediction of new effector candidates that are  
703 not the result of horizontal gene transfer is therefore complicated.

704 To conduct a comprehensive whole genome search of protein tertiary structures an *in*  
705 *silico* screening was employed using BackPhyre (Kelley, Mezulis et al. 2015). We  
706 present here the first necrotrophic fungal pathogen publicly available through  
707 BackPhyre (Kelley, Mezulis et al. 2015) for effector and other protein tertiary  
708 structure searches, providing further annotation evidence for a number of hypothetical  
709 genes. In this pangenome screen of proteins, no other ToxA or ToxB-like paralogues  
710 were identified based on structural similarity in *Ptr*.

711 Overall, the use of protein three-dimensional structure modelling improved the  
712 identification of a number of proteins which included effector candidates potentially  
713 involved in pathogenicity.

### 714 ***In silico* protein structural analysis reveals a natural homologue to *SnTox3*** 715 **in *Pyrenophora***

716 We report here for the first time a distant *SnTox3* natural homologue in *Pyrenophora*.  
717 We showed conserved structural homology between *SnTox3* and *Pyrenophora*  
718 proteins that lacked conservation in the R residue position of the Kex2 motif (LXXR)  
719 and the full set of cysteine residues forming the three disulphide bonds in *SnTox3*.

720 SnTox3 is a pro-domain containing effector, where the signal peptide and pro-domain  
721 are removed (cleaved by the Kex2 protease) to produce a more potent protein that  
722 activates host cell death (Snn3) (Outram, Sung et al. 2021). The Kex2 cleavage motif  
723 (LXXR) has the following residue preferences, a Leucine (L, Leu) or any other  
724 aliphatic residue, any residue X as it does not interact with Kex2, Lysine (K, Lys) but  
725 has other possible residues Lys > Arginine (R, Arg) > Threonine (T, Thr) > Proline (P,  
726 Pro) > Glutamic acid (E, Glu) > Isoleucine (I, Ile) (X) and exclusively an arginine (R,  
727 Arg) before the cleavage site (Outram, Solomon et al. 2021). Here we found the  
728 conserved *Pyrenophora* motif (AKEL) did not conformed to the Kex2 cleavage motif  
729 (LXXR) in two residue positions that included the exclusive arginine residue.  
730 Interestingly, the Ptr structural homologue to SnTox3 was in all isolate races, unlike  
731 the non-active *toxb* that only occurs in non-pathogenic race 4 isolates (not producing  
732 known effectors). As no *in planta* gene expression for the Ptr homologue of *SnTox3*  
733 was detected and the protein sequence had a low effector prediction ranking, we  
734 believe it may not be an effector candidate in the wheat-pathogen system. However,  
735 conversely in Ptt, as the structural homologue to *SnTox3* is expressed during barley  
736 infection (Moolhuijzen, Lawrence et al. 2021) and was ranked as the top candidate  
737 effector, we believe further investigation is warranted. Here, we propose that the  
738 identification of a SnTox3 structural homologue in *Pyrenophora* (Ptm, Ptr and Ptt)  
739 could be part of a structurally defined family and are phylogenetically related to  
740 *SnTox3*, as observed for the *M. oryzae* Avirulence (Avrs) and ToxB (MAX-effector  
741 proteins) (de Guillen, Ortiz-Vallejo et al. 2015).  
742 In conclusion, the new genomic resources presented here improve the pangenome  
743 representation of Ptr and provide putative effector candidates based on structural  
744 modelling and ranking specific to effector producing isolates. These resources can be

745 used to monitor Ptr variations potentially involved in pathogenicity. As Ptr is  
746 commonly shown to infect wheat in combination with other necrotrophic pathogens  
747 (Justesen, Corsi et al. 2021), the future ability to simultaneously monitor such changes  
748 in multiple necrotrophic species may enhance pathogen monitoring activities within a  
749 wider framework of crop protection activities.

## 750 **Funding**

751 This work was generously supported through co-investment by the Grains Research  
752 and Development Corporation (GRDC) and Curtin University (project code  
753 CUR00023), as well as the Australian Government National Collaborative Research  
754 Infrastructure Strategy and Education Investment Fund Super Science Initiative. This  
755 project was also supported by the Agriculture and Food Research Initiative  
756 competitive grants program (award number 2016-67014-24806) and the National  
757 Institute of Food and Agriculture, United States Department of Agriculture (USDA)  
758 Hatch project (ND02234) to ZL. JC, JT and LJ were supported by the ‘Efectawheat’  
759 project funded within the framework of the 2<sup>nd</sup> call ERA-NET for Coordinating Plant  
760 Sciences by British Biological Sciences Research Council (BBSRC) grant  
761 BB/N00518X/1 to JC and the Danish Council of Strategic Research grant case  
762 number 5147-00002B to LJ. The funders had no role in the design of the study; in the  
763 collection, analyses, or interpretation of data; in the writing of the manuscript, or in  
764 the decision to publish the results.

## 765 **Acknowledgements**

766 We thank the Australian grain growers for their continued support of research through  
767 the Grains Research and Development Corporation (GRDC) and the Australian

768 Government National Collaborative Research Infrastructure Strategy (NCRIS) for  
769 providing access to Pawsey Supercomputing under a National Computational Merit  
770 Allocation Scheme (NCMAS), Nectar Research and Pawsey Nimbus Cloud resources.  
771 We would also like to acknowledge Professor Richard Oliver who was key in the  
772 setting up the collaborators in this study as part of the EfectaWheat project.

### 773 **Competing interests**

774 The authors declare no competing interests.

### 775 **Author contributions**

776 Conceptualisation ZL and CSM; methodology, PM, PTS and HP; formal analysis,  
777 PM, PTS, GS and HP; investigation, PM; project resources JC, JT, SS, HB and LJ;  
778 writing - original draft preparation, PM; writing – review and editing, PM, PTS, ZL,  
779 GS, HB, JC, LJ, SS and CM. All authors have read and agreed to the published  
780 version of the manuscript.

### 781 **Data availability**

782 All data generated or analyzed during this study are included and can be accessed in  
783 this published article (and its supplementary files). The sequence data has been  
784 deposited in the DDBJ/ENA/GenBank under accession numbers  
785 JAAFOX000000000, JAHCSW000000000, JAHCYZ000000000, NRDI02000000  
786 (version 2), PSOO00000000-PSOU00000000 and RXHK00000000-RXHN00000000.



## 787 **References**

- 788 Ali S, Gurung S and Adhikari TB (2010). "Identification and Characterization of  
789 Novel Isolates of *Pyrenophora tritici-repentis* from Arkansas." *APS* **94**(2): 229-  
790 235.
- 791 Alouane, T., H. Rimbart, J. Bormann, G. A. Gonzalez-Montiel, S. Loesgen, W.  
792 Schafer, M. Freitag, T. Langin and L. Bonhomme (2021). "Comparative Genomics  
793 of Eight *Fusarium graminearum* Strains with Contrasting Aggressiveness Reveals  
794 an Expanded Open Pangenome and Extended Effector Content Signatures." *Int J*  
795 *Mol Sci* **22**(12).
- 796 Andrews, S. (2011). "FastQC." Retrieved 2016, from  
797 <http://www.bioinformatics.babraham.ac.uk/projects/fastqc/>.
- 798 Andrie, R. M., I. Pandelova and L. M. Ciuffetti (2007). "A Combination of  
799 Phenotypic and Genotypic Characterization Strengthens *Pyrenophora tritici-*  
800 *repentis* Race Identification." *Phytopathology* **97**(6): 694-701.
- 801 Badet, T., U. Oggenfuss, L. Abraham, B. A. McDonald and D. Croll (2020). "A 19-  
802 isolate reference-quality global pangenome for the fungal wheat pathogen  
803 *Zymoseptoria tritici*." *BMC Biol* **18**(1): 12.
- 804 Bankevich, A., S. Nurk, D. Antipov, A. A. Gurevich, M. Dvorkin, A. S. Kulikov, V. M.  
805 Lesin, S. I. Nikolenko, S. Pham, A. D. Pribelski, A. V. Pyshkin, A. V. Sirotkin, N.  
806 Vyahhi, G. Tesler, M. A. Alekseyev and P. A. Pevzner (2012). "SPAdes: a new  
807 genome assembly algorithm and its applications to single-cell sequencing." *J*  
808 *Comput Biol* **19**(5): 455-477.
- 809 Benslimane, H. (2018). "Virulence Phenotyping and Molecular Characterization  
810 of a New Virulence Type of *Pyrenophora tritici-repentis* the Causal Agent of Tan  
811 Spot." *Plant Pathol J* **34**(2): 139-142.
- 812 Benslimane, H., L. Lamari, A. Benbelkacem, R. Sayoud and Z. Bouznad (2011).  
813 "Distribution of races of *Pyrenophora tritici-repentis* in Algeria and identification  
814 of a new virulence type." *Phytopathologia Mediterranea* **50**(2): 203-211.
- 815 Bertagnolli, V. V., J. R. Ferreira, Z. H. Liu, A. C. Rosa and C. C. Deuner (2019).  
816 "Phenotypical and genotypical characterization of *Pyrenophora tritici-repentis*  
817 races in Brazil." *European Journal of Plant Pathology* **154**(4): 995-1007.
- 818 Bertazzoni, S., D. A. B. Jones, H. T. Phan, K. C. Tan and J. K. Hane (2021).  
819 "Chromosome-level genome assembly and manually-curated proteome of model  
820 necrotroph *Parastagonospora nodorum* Sn15 reveals a genome-wide trove of  
821 candidate effector homologs, and redundancy of virulence-related functions  
822 within an accessory chromosome." *BMC Genomics* **22**(1): 382.
- 823 Bertazzoni, S., A. H. Williams, D. A. Jones, R. A. Syme, K. C. Tan and J. K. Hane  
824 (2018). "Accessories Make the Outfit: Accessory Chromosomes and Other  
825 Dispensable DNA Regions in Plant-Pathogenic Fungi." *Molecular Plant-Microbe*  
826 *Interactions* **31**(8): 779-788.
- 827 Bhathal, J. S., R. Loughman and J. Speijers (2003). "Yield reduction in wheat in  
828 relation to leaf disease from yellow (tan) spot and septoria nodorum blotch."  
829 *European Journal of Plant Pathology* **109**(5): 435-443.
- 830 Bolger, A. M., M. Lohse and B. Usadel (2014). "Trimmomatic: a flexible trimmer  
831 for Illumina sequence data." *Bioinformatics* **30**(15): 2114-2120.

- 832 Borodovsky, M. and A. Lomsadze (2011). "Eukaryotic gene prediction using  
833 GeneMark.hmm-E and GeneMark-ES." *Curr Protoc Bioinformatics* **Chapter 4**:  
834 Unit 4 6 1-10.
- 835 Chen, N. (2004). "Using RepeatMasker to identify repetitive elements in genomic  
836 sequences." *Curr Protoc Bioinformatics* **Chapter 4**: Unit 4 10.
- 837 Ciuffetti, L. M., V. A. Manning, I. Pandelova, M. F. Betts and J. P. Martinez (2010).  
838 "Host-selective toxins, Ptr ToxA and Ptr ToxB, as necrotrophic effectors in the  
839 Pyrenophora tritici-repentis-wheat interaction." *New Phytol* **187**(4): 911-919.
- 840 Ciuffetti, L. M., R. P. Tuori and J. M. Gaventa (1997). "A single gene encodes a  
841 selective toxin causal to the development of tan spot of wheat." *Plant Cell* **9**(2):  
842 135-144.
- 843 de Guillen, K., D. Ortiz-Vallejo, J. Gracy, E. Fournier, T. Kroj and A. Padilla (2015).  
844 "Structure Analysis Uncovers a Highly Diverse but Structurally Conserved  
845 Effector Family in Phytopathogenic Fungi." *PLoS Pathog* **11**(10): e1005228.
- 846 Delcher, A. L., S. L. Salzberg and A. M. Phillippy (2003). "Using MUMmer to  
847 identify similar regions in large sequence sets." *Curr Protoc Bioinformatics*  
848 **Chapter 10**: Unit 10 13.
- 849 Dong, S., S. Raffaele and S. Kamoun (2015). "The two-speed genomes of  
850 filamentous pathogens: waltz with plants." *Curr Opin Genet Dev* **35**: 57-65.
- 851 Downie, R. C., M. Lin, B. Corsi, A. Ficke, M. Lillemo, R. P. Oliver, H. T. T. Phan, K. C.  
852 Tan and J. Cockram (2021). "Septoria Nodorum Blotch of Wheat: Disease  
853 Management and Resistance Breeding in the Face of Shifting Disease Dynamics  
854 and a Changing Environment." *Phytopathology* **111**(6): 906-920.
- 855 Emms, D. M. and S. Kelly (2015). "OrthoFinder: solving fundamental biases in  
856 whole genome comparisons dramatically improves orthogroup inference  
857 accuracy." *Genome Biol* **16**: 157.
- 858 Faris, J. D., Z. Liu and S. S. Xu (2013). "Genetics of tan spot resistance in wheat."  
859 *Theor Appl Genet* **126**(9): 2197-2217.
- 860 Figueroa Betts, M., V. A. Manning, K. B. Cardwell, I. Pandelova and L. M. Ciuffetti  
861 (2011). "The importance of the N-terminus for activity of Ptr ToxB, a chlorosis-  
862 inducing host-selective toxin produced by Pyrenophora tritici-repentis."  
863 *Physiological and Molecular Plant Pathology* **75**(4): 138-145.
- 864 Friesen, T. L., E. H. Stukenbrock, Z. Liu, S. Meinhardt, H. Ling, J. D. Faris, J. B.  
865 Rasmussen, P. S. Solomon, B. A. McDonald and R. P. Oliver (2006). "Emergence of  
866 a new disease as a result of interspecific virulence gene transfer." *Nat Genet*  
867 **38**(8): 953-956.
- 868 Friesen, T. L., Z. Zhang, P. S. Solomon, R. P. Oliver and J. D. Faris (2008).  
869 "Characterization of the interaction of a novel Stagonospora nodorum host-  
870 selective toxin with a wheat susceptibility gene." *Plant Physiol* **146**(2): 682-693.
- 871 Guo, J., G. Shi, A. Kalil, A. Friskop, E. Elias, S. S. Xu, J. D. Faris and Z. Liu (2020).  
872 "Pyrenophora tritici-repentis Race 4 Isolates Cause Disease on Tetraploid  
873 Wheat." *Phytopathology* **110**(11): 1781-1790.
- 874 Jiang, H., R. Lei, S. W. Ding and S. Zhu (2014). "Skewer: a fast and accurate  
875 adapter trimmer for next-generation sequencing paired-end reads." *BMC*  
876 *Bioinformatics* **15**: 182.
- 877 Jones, D. A. B., L. Rozano, J. W. Debler, R. L. Mancera, P. M. Moolhuijzen and J. K.  
878 Hane (2021). "An automated and combinative method for the predictive ranking  
879 of candidate effector proteins of fungal plant pathogens." *Sci Rep* **11**(1): 19731.

- 880 Justesen, A. F., B. Corsi, A. Ficke, L. Hartl, S. Holdgate, L. N. Jørgensen, M. Lillemo,  
881 M. Lin, I. J. Mackay, V. Mohler, M. Stadlmeier, K.-C. Tan, J. Turner, R. P. Oliver and  
882 J. Cockram (2021). "Hidden in plain sight: a molecular field survey of three wheat  
883 leaf blotch fungal diseases in North-Western Europe shows co-infection is  
884 widespread." European Journal of Plant Pathology **160**(4): 949-962.
- 885 Kamel, S., M. Cherif, M. Hafez, T. Despins and R. Aboukhaddour (2019).  
886 "Pyrenophora tritici-repentis in Tunisia: Race Structure and Effector Genes."  
887 Front Plant Sci **10**: 1562.
- 888 Kariyawasam, G. K., N. Wyatt, G. Shi, S. Liu, C. Yan, Y. Ma, S. Zhong, J. B.  
889 Rasmussen, P. Moolhuijzen, C. S. Moffat, T. L. Friesen and Z. Liu (2021). "A  
890 genome-wide genetic linkage map and reference quality genome sequence for a  
891 new race in the wheat pathogen Pyrenophora tritici-repentis." Fungal Genet Biol  
892 **152**: 103571.
- 893 Kelley, L. A., S. Mezulis, C. M. Yates, M. N. Wass and M. J. Sternberg (2015). "The  
894 Phyre2 web portal for protein modeling, prediction and analysis." Nat Protoc  
895 **10**(6): 845-858.
- 896 Kim, D. and S. L. Salzberg (2011). "TopHat-Fusion: an algorithm for discovery of  
897 novel fusion transcripts." Genome Biol **12**(8): R72.
- 898 Kim, Y. M. and S. E. Strelkov (2007). "Heterologous expression and activity of Ptr  
899 ToxB from virulent and avirulent isolates of Pyrenophora tritici-repentis."  
900 Canadian Journal of Plant Pathology **29**(3): 232-242.
- 901 Klotzl, F. and B. Haubold (2020). "Phylonium: fast estimation of evolutionary  
902 distances from large samples of similar genomes." Bioinformatics **36**(7): 2040-  
903 2046.
- 904 Kohany O, Gentles AJ, Hankus L and Jurka J (2006). "Annotation, submission and  
905 screening of repetitive elements in Repbase: RepbaseSubmitter and Censor."  
906 BMC Bioinformatics **7**: 474.
- 907 Koren, S., B. P. Walenz, K. Berlin, J. R. Miller, N. H. Bergman and A. M. Phillippy  
908 (2017). "Canu: scalable and accurate long-read assembly via adaptive k-mer  
909 weighting and repeat separation." Genome Res **27**(5): 722-736.
- 910 Koski LB, Gray MW, Lang BF and Burger G (2005). "AutoFACT: an automatic  
911 functional annotation and classification tool." BMC Bioinformatics **6**: 151.
- 912 Lamari, L. and C. C. Bernier (1989). "Virulence of isolates of Pyrenophora tritici-  
913 repentis on 11 wheat cultivars and cytology of the differential host reactions."  
914 Canadian Journal of Plant Pathology **September 1989**: 284-290.
- 915 Lamari, L. and C. C. Bernier (1991). "Genetics of Tan Necrosis and Extensive  
916 Chlorosis in Tan Spot of Wheat Caused by Pyrenophora-Tritici-Repentis."  
917 Phytopathology **81**(10): 1092-1095.
- 918 Lamari, L., J. Gilbert and A. Tekauz (1998). "Race differentiation in Pyrenophora  
919 tritici-repentis and survey of physiologic variation in western Canada." Canadian  
920 Journal of Plant Pathology-Revue Canadienne De Phytopathologie **20**(4): 396-  
921 400.
- 922 Lamari, L., R. Sayoud, M. Boulif and C. C. Bernier (1995). "Identification of a new  
923 race in Pyrenophora tritici-repentis: implications for the current pathotype  
924 classification system." Canadian Journal of Plant Pathology **17**(4): 312-318.
- 925 Lamari, L. and S. E. Strelkov (2010). "The wheat/Pyrenophora tritici-repentis  
926 interaction: progress towards an understanding of tan spot disease." Canadian  
927 Journal of Plant Pathology **32**(1): 4-10.

- 928 Li H and Durbin R (2009). "Fast and accurate short read alignment with  
929 Burrows-Wheeler transform." *Bioinformatics* **25**(14): 1754-1760.
- 930 Manning, V. A., I. Pandelova, B. Dhillon, L. J. Wilhelm, S. B. Goodwin, A. M. Berlin,  
931 M. Figueroa, M. Freitag, J. K. Hane, B. Henrissat, W. H. Holman, C. D. Kodira, J.  
932 Martin, R. P. Oliver, B. Robbertse, W. Schackwitz, D. C. Schwartz, J. W. Spatafora,  
933 B. G. Turgeon, C. Yandava, S. Young, S. Zhou, Q. Zeng, I. V. Grigoriev, L. J. Ma and L.  
934 M. Ciuffetti (2013). "Comparative genomics of a plant-pathogenic fungus,  
935 *Pyrenophora tritici-repentis*, reveals transduplication and the impact of repeat  
936 elements on pathogenicity and population divergence." *G3 (Bethesda)* **3**(1): 41-  
937 63.
- 938 McDonald, M. C., D. Ahren, S. Simpfendorfer, A. Milgate and P. S. Solomon (2017).  
939 "The discovery of the virulence gene ToxA in the wheat and barley pathogen  
940 *Bipolaris sorokiniana*." *Mol Plant Pathol* **19**(2): 432-439.
- 941 Moffat, C. S., P. T. See and R. P. Oliver (2014). "Generation of a ToxA knockout  
942 strain of the wheat tan spot pathogen *Pyrenophora tritici-repentis*." *Mol Plant*  
943 *Pathol* **15**(9): 918-926.
- 944 Moolhuijzen, P., J. Lawrence and S. R. Ellwood (2021). "Potentiators of disease  
945 during barley infection by *Pyrenophora teres f. teres* in a susceptible  
946 interaction." *Mol Plant Microbe Interact*
- 947 Moolhuijzen, P., P. T. See, J. K. Hane, G. Shi, Z. Liu, R. P. Oliver and C. S. Moffat  
948 (2018). "Comparative genomics of the wheat fungal pathogen *Pyrenophora*  
949 *tritici-repentis* reveals chromosomal variations and genome plasticity." *BMC*  
950 *Genomics* **19**(1): 279.
- 951 Moolhuijzen, P., P. T. See and C. S. Moffat (2018). "Exploration of wheat and  
952 pathogen transcriptomes during tan spot infection." *BMC Res Notes* **11**(1): 907.
- 953 Moolhuijzen, P., P. T. See and C. S. Moffat (2019). "A new PacBio genome  
954 sequence of an Australian *Pyrenophora tritici-repentis* race 1 isolate." *BMC Res*  
955 *Notes* **12**(1): 642.
- 956 Moolhuijzen, P., P. T. See and C. S. Moffat (2020). "PacBio genome sequencing  
957 reveals new insights into the genomic organisation of the multi-copy ToxB gene  
958 of the wheat fungal pathogen *Pyrenophora tritici-repentis*." *BMC Genomics*  
959 **21**(1): 645.
- 960 Moolhuijzen, P. M., P. T. See, R. P. Oliver and C. S. Moffat (2018). "Genomic  
961 distribution of a novel *Pyrenophora tritici-repentis* ToxA insertion element."  
962 *PLoS One* **13**(10): e0206586.
- 963 Murray GM and Brennan JP (2009). "Estimating disease losses to the Australian  
964 wheat industry." *Australasian Plant Pathology* **38**(6): 558-570.
- 965 Osbourn, A. (2010). "Secondary metabolic gene clusters: evolutionary toolkits for  
966 chemical innovation." *Trends Genet* **26**(10): 449-457.
- 967 Outram, M. A., P. S. Solomon and S. J. Williams (2021). "Pro-domain processing of  
968 fungal effector proteins from plant pathogens." *PLoS Pathog* **17**(10): e1010000.
- 969 Outram, M. A., Y. C. Sung, D. Yu, B. Dagvadorj, S. A. Rima, D. A. Jones, D. J. Ericsson,  
970 J. Sperschneider, P. S. Solomon, B. Kobe and S. J. Williams (2021). "The crystal  
971 structure of SnTox3 from the necrotrophic fungus *Parastagonospora nodorum*  
972 reveals a unique effector fold and provides insight into Snn3 recognition and  
973 pro-domain protease processing of fungal effectors." *New Phytol*.
- 974 Petersen TN, Brunak S, von Heijne G and Nielsen H (2011). "SignalP 4.0:  
975 discriminating signal peptides from transmembrane regions." *Nature Methods*  
976 **8**(10): 785-786.

- 977 Quevillon, E., V. Silventoinen, S. Pillai, N. Harte, N. Mulder, R. Apweiler and R.  
978 Lopez (2005). "InterProScan: protein domains identifier." Nucleic Acids Res  
979 **33**(Web Server issue): W116-120.
- 980 Retief, J. D. (2000). "Phylogenetic analysis using PHYLIP." Methods Mol Biol **132**:  
981 243-258.
- 982 Richards, J. K., N. A. Wyatt, Z. Liu, J. D. Faris and T. L. Friesen (2017). "Reference  
983 Quality Genome Assemblies of Three Parastagonospora nodorum Isolates  
984 Differing in Virulence on Wheat." G3 (Bethesda).
- 985 Rotkiewicz, P. (2007). iMol Molecular Visualization Program.  
986 <http://www.pirx.com/iMol>
- 987 RStudio-Team. (2020). "RStudio: Integrated Development Environment for R."  
988 1.3.1093. from <http://www.rstudio.com/>.
- 989 Rybak, K., P. T. See, H. T. Phan, R. A. Syme, C. S. Moffat, R. P. Oliver and K. C. Tan  
990 (2017). "A functionally conserved Zn<sub>2</sub> Cys<sub>6</sub> binuclear cluster transcription factor  
991 class regulates necrotrophic effector gene expression and host-specific virulence  
992 of two major Pleosporales fungal pathogens of wheat." Mol Plant Pathol **18**(3):  
993 420-434.
- 994 See, P. T., K. A. Marathamuthu, E. M. Iagallo, R. P. Oliver and C. S. Moffat (2018).  
995 "Evaluating the importance of the tan spot ToxA-Tsn1 interaction in Australian  
996 wheat varieties." Plant Pathology **67**(5): 1066-1075.
- 997 Seppey, M., M. Manni and E. M. Zdobnov (2019). "BUSCO: Assessing Genome  
998 Assembly and Annotation Completeness." Methods Mol Biol **1962**: 227-245.
- 999 Shi, G. S., G. Kariyawasam, S. Liu, Y. Leng, S. Zhong, S. Ali, P. Moolhuijzen, C.  
1000 Moffat, J. B. Rasmussen, T. L. Friesen, J. D. Faris and Z. Liu (2022). "A conserved  
1001 hypothetical gene is required but not sufficient for Ptr ToxC production in  
1002 Pyrenophora tritici-repentis." Mol Plant Microbe Interact.
- 1003 Shiryev, S. A., J. S. Papadopoulos, A. A. Schaffer and R. Agarwala (2007).  
1004 "Improved BLAST searches using longer words for protein seeding."  
1005 Bioinformatics **23**(21): 2949-2951.
- 1006 Slater, G. S. and E. Birney (2005). "Automated generation of heuristics for  
1007 biological sequence comparison." BMC Bioinformatics **6**: 31.
- 1008 Sperschneider, J. and P. Dodds (2021). "EffectorP 3.0: prediction of apoplastic  
1009 and cytoplasmic effectors in fungi and oomycetes." Mol Plant Microbe Interact.
- 1010 Sperschneider, J., P. N. Dodds, D. M. Gardiner, K. B. Singh and J. M. Taylor (2018).  
1011 "Improved prediction of fungal effector proteins from secretomes with EffectorP  
1012 2.0." Mol Plant Pathol **19**(9): 2094-2110.
- 1013 Strelkov, S. E., L. Lamari and G. M. Ballance (1999). "Characterization of a host-  
1014 specific protein toxin (Ptr ToxB) from Pyrenophora tritici-repentis." Molecular  
1015 Plant-Microbe Interactions **12**(8): 728-732.
- 1016 Sullivan, M. J., N. K. Petty and S. A. Beatson (2011). "Easyfig: a genome  
1017 comparison visualizer." Bioinformatics **27**(7): 1009-1010.
- 1018 Syme, R. A., A. Martin, N. A. Wyatt, J. A. Lawrence, M. J. Muria-Gonzalez, T. L.  
1019 Friesen and S. R. Ellwood (2018). "Transposable Element Genomic Fissuring in  
1020 Pyrenophora teres Is Associated With Genome Expansion and Dynamics of Host-  
1021 Pathogen Genetic Interactions." Front Genet **9**: 130.
- 1022 Syme, R. A., K. C. Tan, J. K. Hane, K. Dodhia, T. Stoll, M. Hastie, E. Furuiki, S. R.  
1023 Ellwood, A. H. Williams, Y. F. Tan, A. C. Testa, J. J. Gorman and R. P. Oliver (2016).  
1024 "Comprehensive Annotation of the Parastagonospora nodorum Reference

1025 Genome Using Next-Generation Genomics, Transcriptomics and  
1026 Proteogenomics." *PLoS One* **11**(2): e0147221.  
1027 Team", R. C. (2021). R: A Language and Environment for Statistical Computing, R  
1028 Foundation for Statistical Computing.  
1029 Testa, A. C., J. K. Hane, S. R. Ellwood and R. P. Oliver (2015). "CodingQuarry:  
1030 highly accurate hidden Markov model gene prediction in fungal genomes using  
1031 RNA-seq transcripts." *BMC Genomics* **16**: 170.  
1032 Testa, A. C., R. P. Oliver and J. K. Hane (2016). "OcculterCut: A Comprehensive  
1033 Survey of AT-Rich Regions in Fungal Genomes." *Genome Biol Evol* **8**(6): 2044-  
1034 2064.  
1035 Tuori, R. P., T. J. Wolpert and L. M. Ciuffetti (1995). "Purification and  
1036 immunological characterization of toxic components from cultures of  
1037 *Pyrenophora tritici-repentis*." *Mol Plant Microbe Interact* **8**(1): 41-48.  
1038 Urban, M., A. Cuzick, K. Rutherford, A. Irvine, H. Pedro, R. Pant, V. Sadanadan, L.  
1039 Khamari, S. Billal, S. Mohanty and K. E. Hammond-Kosack (2017). "PHI-base: a  
1040 new interface and further additions for the multi-species pathogen-host  
1041 interactions database." *Nucleic Acids Res* **45**(D1): D604-D610.  
1042 Vernikos, G., D. Medini, D. R. Riley and H. Tettelin (2015). "Ten years of pan-  
1043 genome analyses." *Curr Opin Microbiol* **23**: 148-154.  
1044 Walker, B. J., T. Abeel, T. Shea, M. Priest, A. Abouelliel, S. Sakthikumar, C. A.  
1045 Cuomo, Q. Zeng, J. Wortman, S. K. Young and A. M. Earl (2014). "Pilon: an  
1046 integrated tool for comprehensive microbial variant detection and genome  
1047 assembly improvement." *PLoS One* **9**(11): e112963.  
1048

## 1049 **Figure legends**

1050 Fig. 1. Whole genome analysis of *Ptr* isolates. A) Geographic source and number of  
1051 *Ptr* isolates currently available and analysed. Legend shows the number of isolates. B)  
1052 Whole genome phylogenetic tree of *Ptr* isolates from Illumina sequencing (Alg130,  
1053 T199, T205, Alg215, CC142, EW306-2-1, EW4-4, EW7m1, DW7, Pt-1C-BFP,  
1054 Ptr239, Ptr11137, Ptr5213, SD20, SN001A, SN001C, SN002B), PacBio Technologies  
1055 (86-124, 90-2, AR CrossB10, Biotrigo9-1, DW5, Ls13-192, M4 and V1) and Oxford  
1056 Nanopore Technologies (Ptr134). The unrooted neighbour joining phylogenetic tree  
1057 displays clades for the European (violet) and North Africa (tan) isolates. Geographic  
1058 source of the other isolates are Australian (blue), USA (green), Canada (red) and  
1059 Brazil (purple). The race 4 isolates (Ls13-192, 90-2 and SD20) have the greatest

1060 distance from the clade of known effector producing isolates. C) Unrooted Neighbour  
1061 joining phylogenetic tree for Ptr (purple clade), *Pyrenophora teres* (*P. teres* f.  
1062 *maculata* (Ptm) and *P. teres* f. *teres* (Ptt)) (orange clade), *Bipolaris* (*B. sorokiniana*  
1063 (Bs1-3 and Q7399), *B. maydis* (Bm-ATCC and Bm-C5) and *Bipolaris zeicola* (Bz)  
1064 (green clade), *Parastagonospora nodorum* (Sn4, Sn15 and Sn79) (yellow clade),  
1065 *Leptosphaeria maculans* (Lm) and *Zymoseptoria tritici* (Zt) isolates. The branches for  
1066 race 4 isolates not producing known effectors (Ls13-192, 90-2 and SD20) are  
1067 highlighted (blue) within the Ptr clade. D) Circular plots show 10 kb regions of  
1068 absence plotted for the Ptr isolates genomes sequenced using long-read technologies  
1069 (PacBio and Oxford Nanopore Technology) as compared with the chromosomes of  
1070 the reference Ptr genome of isolate M4. Isolates are coloured by race. Three regions  
1071 of interest are highlighted in grey and zoomed at 20x for chromosome 2 and  
1072 chromosome 1, and 40x for chromosome 9.

1073

1074 Fig. 2. Ptr pangenome predicted mRNA correlation plots for gene sequence  
1075 percentage identity (A) and gene copy number (B). Ptr isolates from Illumina  
1076 sequencing (Alg130, T199, T205, Alg215, CC142, EW306-2-1, EW4-4, EW7m1,  
1077 DW7, Pt-1C-BFP, Ptr239, Ptr11137, Ptr5213, SD20, SN001A, SN001C, SN002B),  
1078 PacBio Technologies (86-124 (Ptr86-124), 90-2 (Ptr90-2), AR CrossB10, Biotrigo9-  
1079 1, DW5, Ls13-192, M4 and V1) and Oxford Nanopore Technologies (Ptr134).

1080

1081 Fig. 3. Ptr isolate M4 *ToxC1* locus and 2 kb flanking sequence region alignment to  
1082 twelve other Ptr *ToxC* producing isolates. The Biotrigo9-1 *ToxC1* region has two  
1083 large insertions within and downstream of *ToxC1*. Nucleotide sequence alignments  
1084 (blue) between the *ToxC1* region for Ptr isolates (top to bottom M4, AR CrossB10,

1085 Biotrigo9-1, Pt-1C-BFP, V1, Ptr134, Alg215, CC142, EW306-2-1, EW7m1,  
1086 SN0001A, SN0001C and SN0002B) (black lines). The M4 genes are shown as red  
1087 arrows. The light blue alignment segments are regions of low identity among the  
1088 isolates, while the crossed regions indicate a repeat region in each sequence.

1089

1090 Fig. 4. The predicted protein sequence and structural alignments of SnTox3 and the  
1091 isolate M4 protein KAF7577476. A) Multiple protein sequence alignment of SnTox3,  
1092 Ptt CAA9973983.1 (W1-1), Ptm CAA9957881.1 (SG1) and Ptr KAF7577476 (M4).  
1093 The Kex2 motif conservation is shown boxed in red. Only four cysteine residues were  
1094 conserved across the four species (black asterisks) and those not conserved (red  
1095 asterisks) are shown below the alignment for *P. nodorum* and above for the  
1096 *Pyrenophora* spp. B) The known 3-D protein structure for SnTox3 (PDB 6WES). C)  
1097 The 3-D structure for KAF7577476 as predicted by Phyre2. D) Superimposed  
1098 structural alignment (yellow) of SnTox3 and KAF7577476 with an RSDM of 1.14  
1099 A°.

## 1100 **Supporting Information**

### 1101 **Supplementary data**

1102 Supplementary data 1 XLSX. Predicted effector genes for *Pyrenophora tritici-*  
1103 *repentis* genomes.

1104

1105 Supplementary data 2 PDF. List of URLs for publicly available isolate genomes  
1106 downloaded from NCBI for this study.

1107



1108 Supplementary data 3 XLSX. Predicted biosynthetic gene clusters for *Pyrenophora*  
1109 *tritici-repentis* genomes.

1110

1111 Supplementary data 4 XLSX. Orthologous protein clusters for *Pyrenophora tritici-*  
1112 *repentis* genomes.

1113

1114 Supplementary data 5 XLSX. Phyre2 three-dimensional protein modelling for  
1115 *Pyrenophora tritici-repentis* predicted effector proteins.

1116

### 1117 **Supplementary figures**

1118 Supplementary Fig. S1. BUSCO quantitative assessment of the completeness of  
1119 genome assemblies in terms of expected gene content.

1120

1121 Supplementary Fig. S2. Ptr *ToxB* and *tox b* nucleotide sequence alignments.

1122

1123 Supplementary Fig. S3. Ptr *ToxB* and *tox b* protein sequence alignments.

1124

1125 Supplementary Fig. S4. Ptr Alg215 isolate partial *ToxB* sequence alignments show

1126 Alg215 *ToxB* is truncated at the 5' end of the sequence. A) The first 162 nucleotide

1127 bases of Alg215 scaffold 03337 sequence aligned to the *ToxB* coding sequence (CDS)

1128 (99-261 bp). A *ToxB* single nucleotide polymorphism (SNP; at the 149 bp position)

1129 shows a thiamine nucleotide change to guanine (T > G). B) The Alg215 *ToxB* region

1130 protein translated (1-94 aa) aligned to the *ToxB* protein sequence (1-87 bp). A

1131 nonsynonymous amino acid residue change (I>R) at *ToxB* residue position 50 is

1132 beyond the ToxB signal peptide cleavage site between amino acid positions 23 and  
1133 24.

1134

1135 Supplementary Fig. S5. Ptr plant leaf infection assays to identify isolate ToxA  
1136 production by the development of necrosis symptoms on the differential wheat  
1137 cultivar Glenlea (left hand side) and ToxB production by chlorosis symptoms on the  
1138 differential wheat line 6B662 (sensitive) (right hand side).

1139

1140 Supplementary Fig. S6. Ptr plant infection assays to confirm no symptoms on  
1141 response to the differential wheat line Auburn (insensitive) (left hand side) and ToxC  
1142 production by chlorosis symptoms on the differential wheat line 6B365 (right hand  
1143 side).

1144

1145 Supplementary Fig. S7. Closer examination a large 1 Mb distal region on isolate M4  
1146 contig 1 and many smaller regions were absent in isolates Alg130, T199 and T205 but  
1147 present in Alg215.

1148

1149 Supplementary Fig. S8. Phylogenetic analysis of publicly available ascomycete  
1150 genomes downloaded from NCBI.

1151

1152 Supplementary Fig. S9. Ptr isolate M4 ToxA horizontal transfer and flanking genomic  
1153 region (400 kb) alignments for race 1, 2, 4, 5 and unknown races. Break points are  
1154 displayed for the large 128 kb insertion in the M4 isolate. The *ToxA* horizontal  
1155 transfer region is absent in all non-ToxA producing races (race 4, 5 and unknown) and  
1156 present in ToxA producing races (race 1 and 2).

1157

1158 Supplementary Fig. S10. Circular plots show 10 kb regions of absence for Ptr isolates  
1159 as compared to M4, coloured by race. The left plot shows assembled isolate genomes  
1160 sequenced from long-read technologies, PacBio and Oxford Nanopore Technology.  
1161 The right plot displays all the genomes.

1162

1163 Supplementary Fig. S11. DW5 chromosome 11 *ToxB2* and flanking genomic region  
1164 alignments for race 1, 2, 4, 5 and unknown races. Slide 1, EasyFig Blastn alignments  
1165 for 400 kb region. Top to bottom DW5 aligned to race 4 (90-2 and Ls13-192), race  
1166 unknown (AR CrossB10), race 2 (86-124 and Biotrigo9-1) and race 1 (V1, M4 and  
1167 Ptr134). Slide 2, NUCmer sequence dot plot for 200 kb region.

1168

1169 Supplementary Fig. S12. Ptr loci found only in PacBio sequenced ToxC-producing  
1170 isolates. Loci are absent in non-ToxC producing Ptr isolates Ls13-192 (race 4), 86-  
1171 124 and Biotrigo9-1 (race 2), DW5 (race 5) and are present in ToxC producing  
1172 isolates AR CrossB10 (AR, race unknown), V1 and M4 (race 1) isolates. M4 isolate  
1173 had multiple gene copies, while some genes were absent in Pt-1C-BFP (race 1).

1174

1175 Supplementary Fig. S13. RNA expression for *Pyrenophora tritici-repentis* isolate M4  
1176 for the M4 ToxC producing isolate specific gene cluster 64 kb region (red). The read  
1177 coverage and alignments show RNA expression *in vitro* (top) and *in planta* (below)  
1178 on chromosome 9 (CM025803.1).

1179

1180 Supplementary Fig. S14. Ptr isolate Biotrigo9-1 *ToxC1* genomic region on contig 12  
1181 (43,362-60,409 bp) shows *ToxC1* is disrupted by a large single insertion (5,348 bp in

1182 size) positioned from 45,946 to 51,292 bp that carries a nested long terminal repeat  
1183 (LTR) retrotransposon and the motifs for the Copia retrotransposon transposable  
1184 element (TE).

1185

1186 Supplementary Fig. S15. Ptr pangenome predicted effectors specific to race 4 and  
1187 specific to known effector producing isolates (non-race 4). A) Boxplot of protein  
1188 lengths. B) Boxplot of effector probability scores. C) Violin plot of lengths. D) Violin  
1189 plot of effector probability scores.

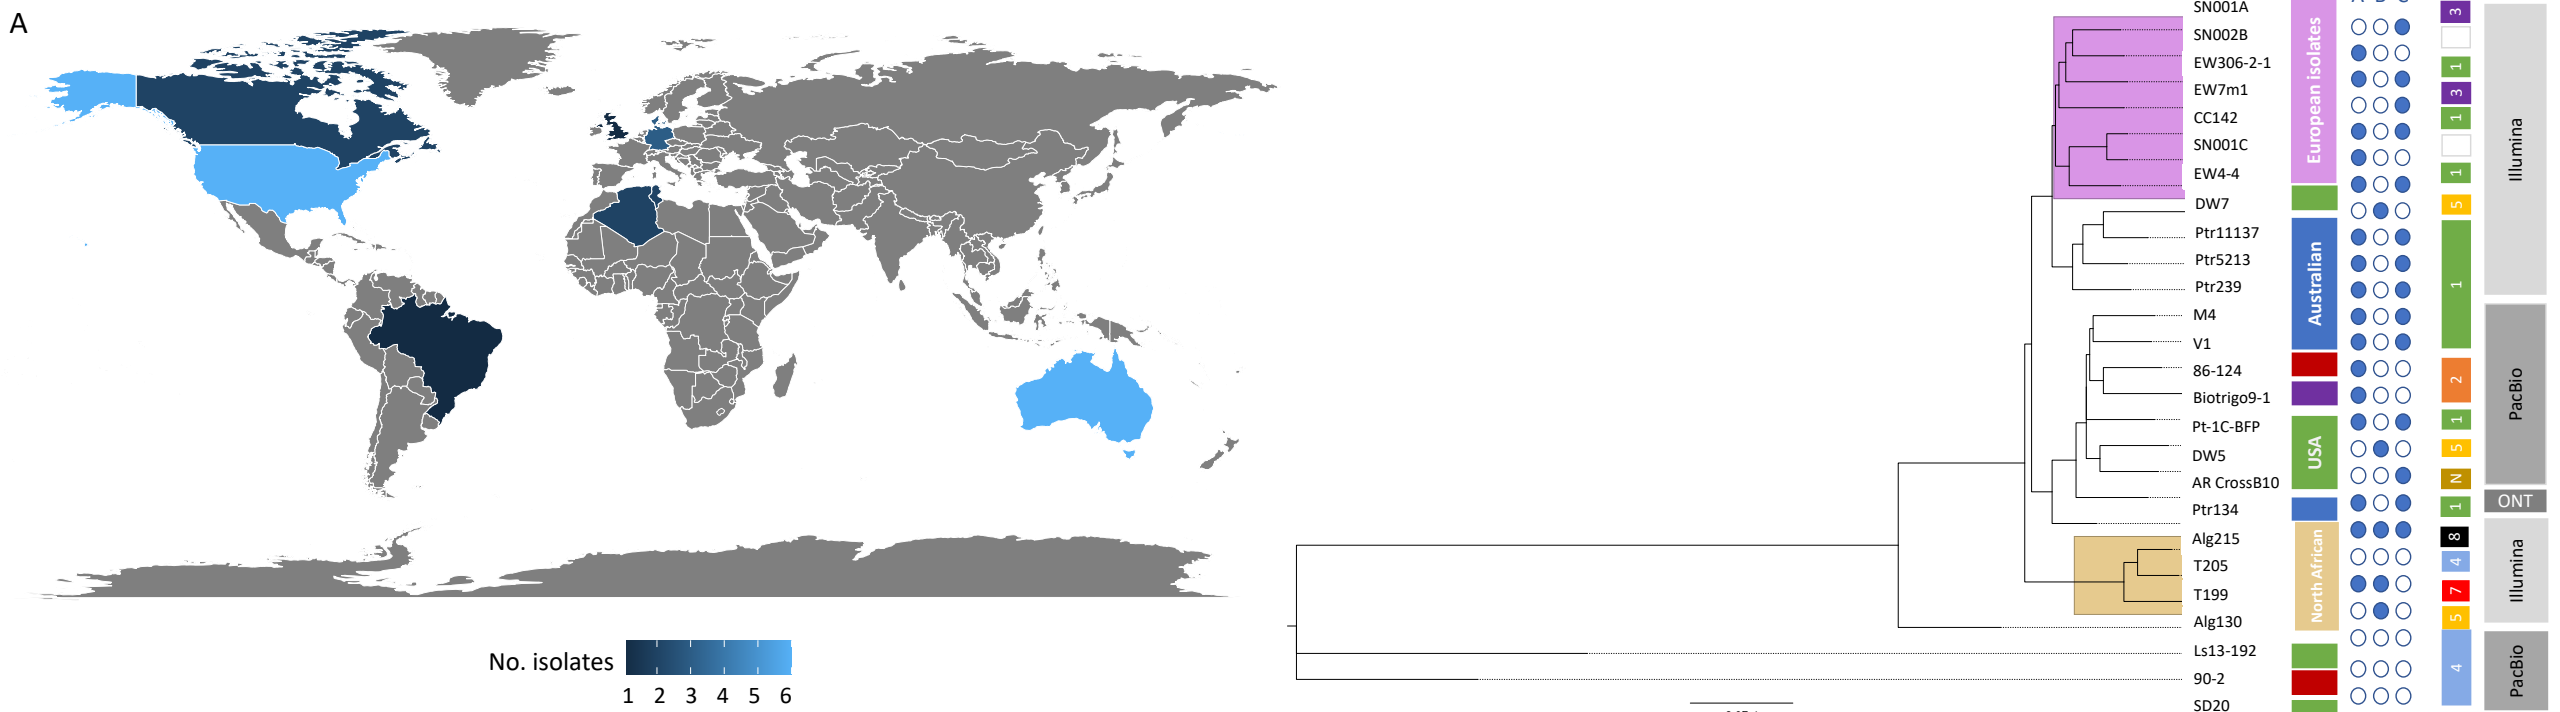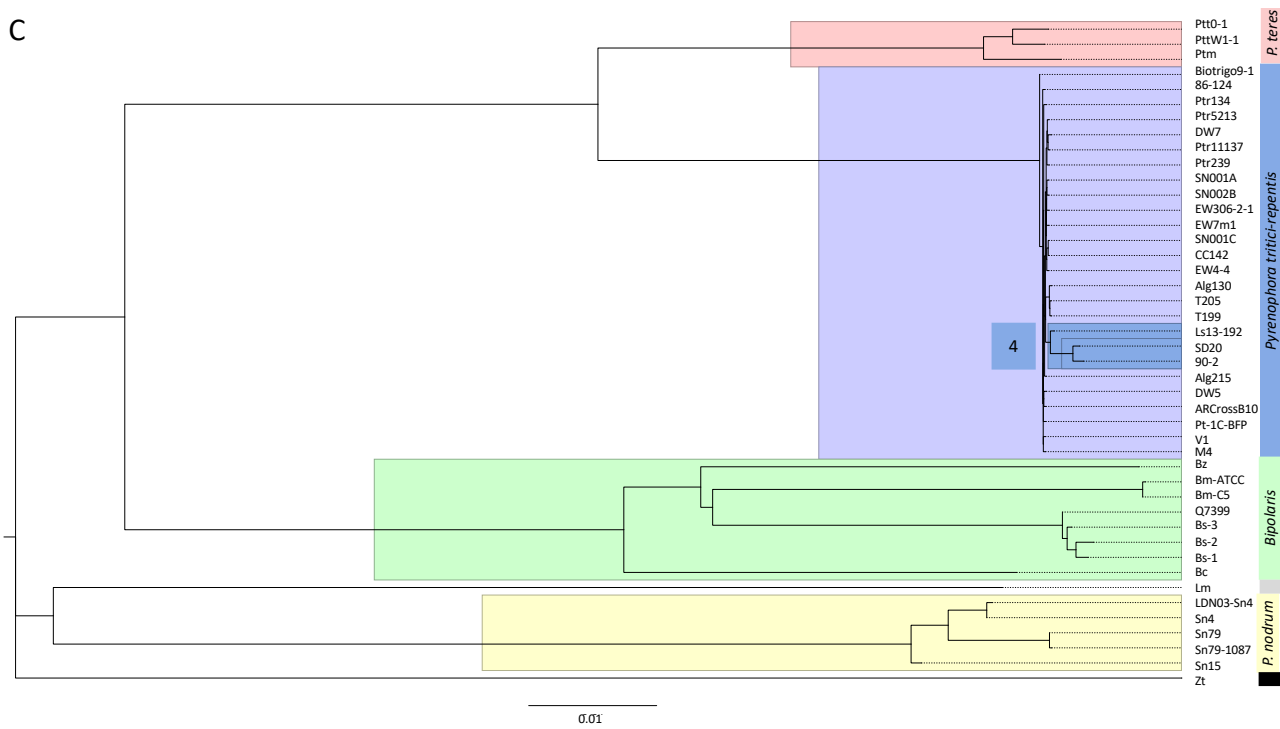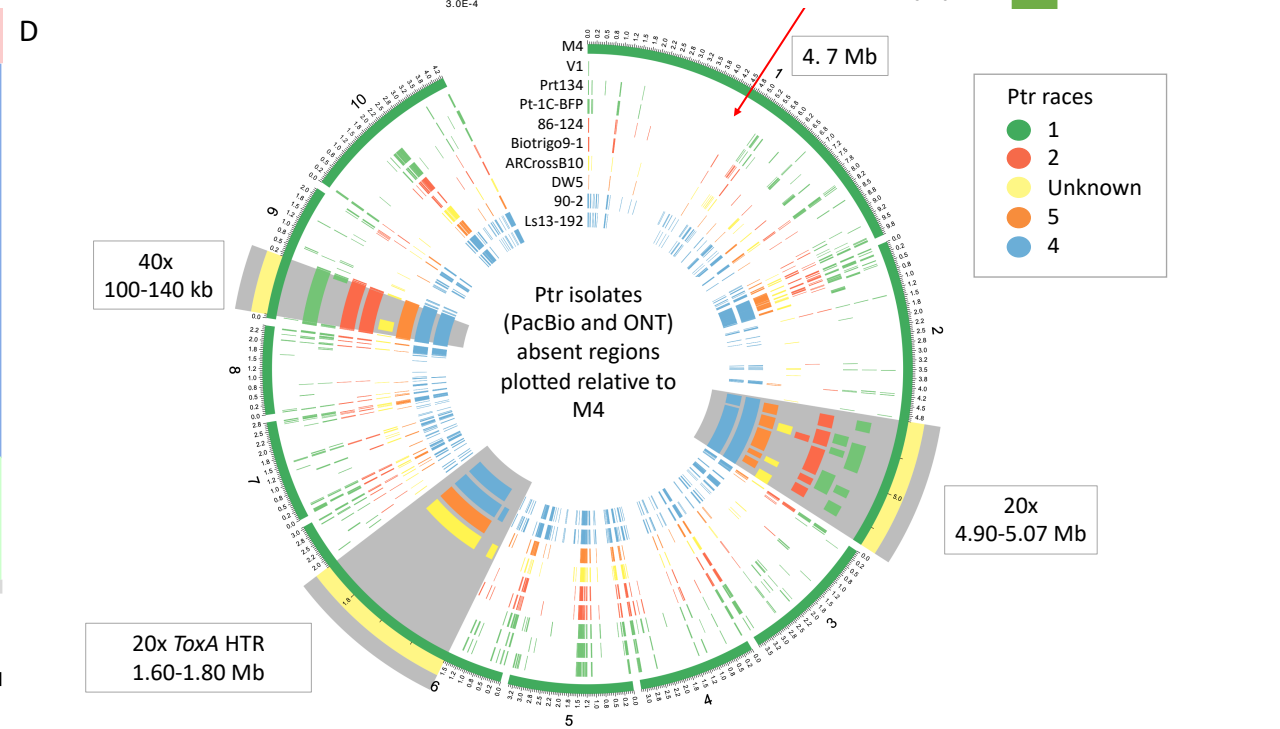

A

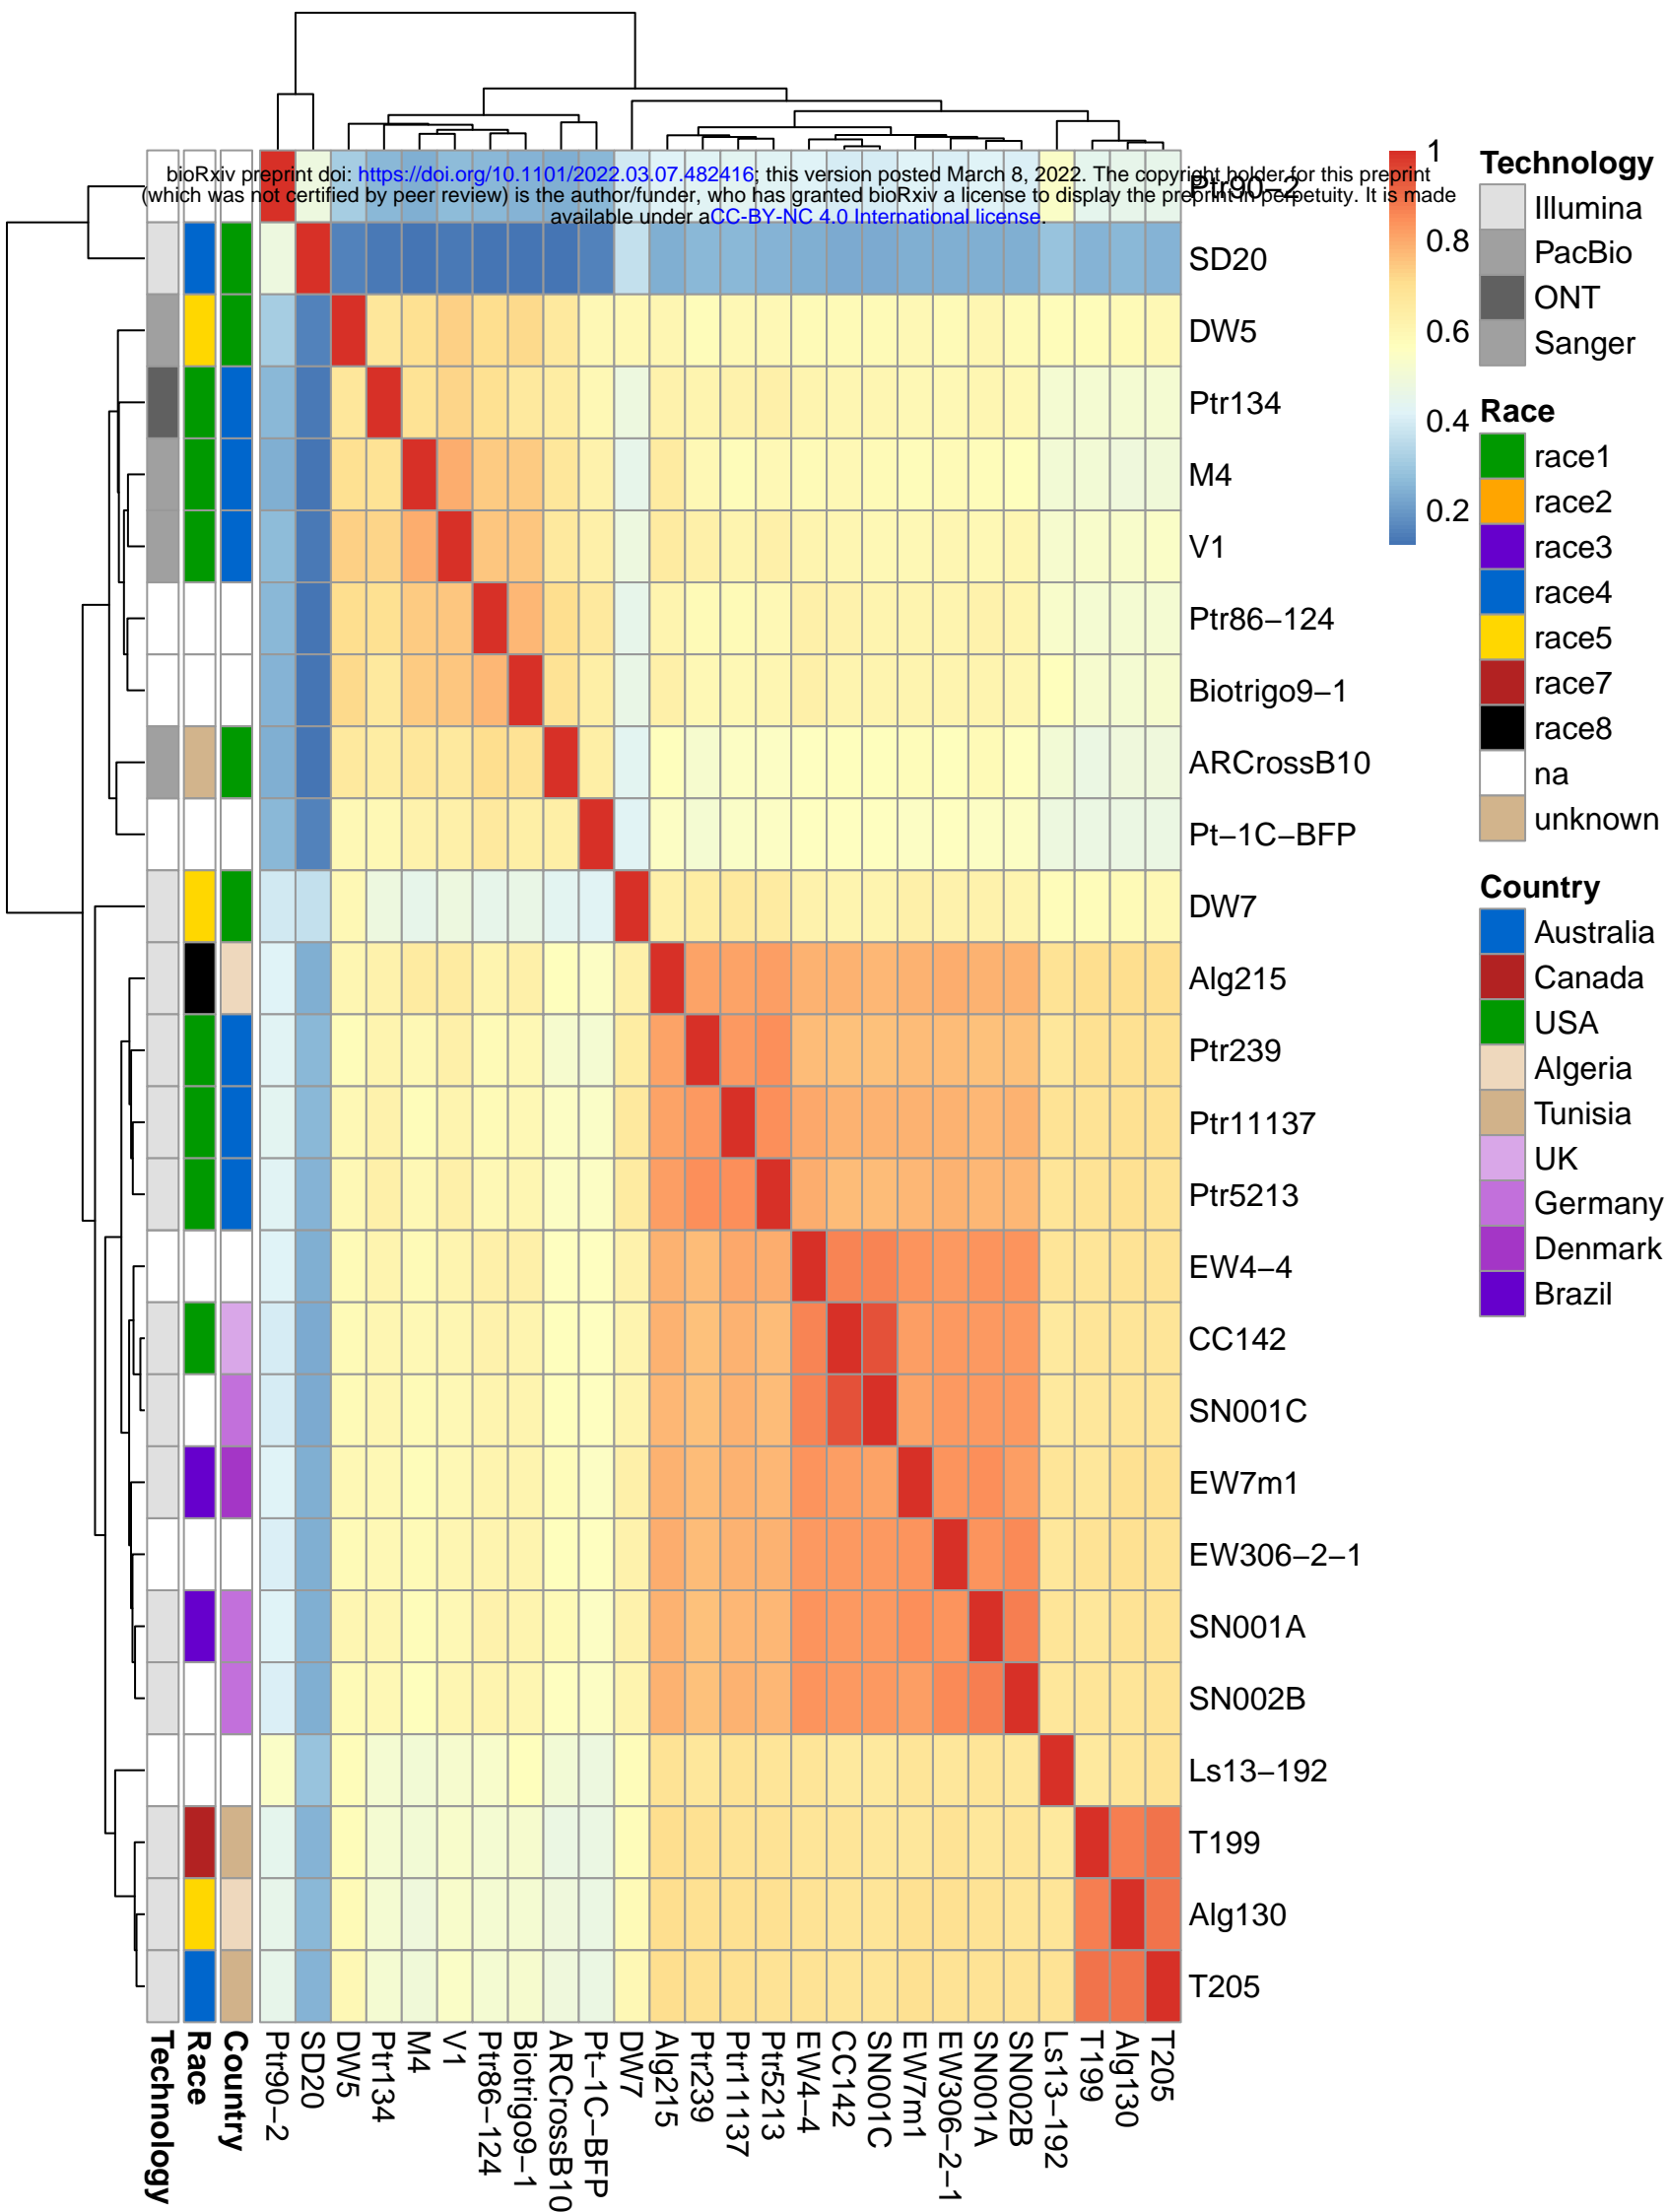

B

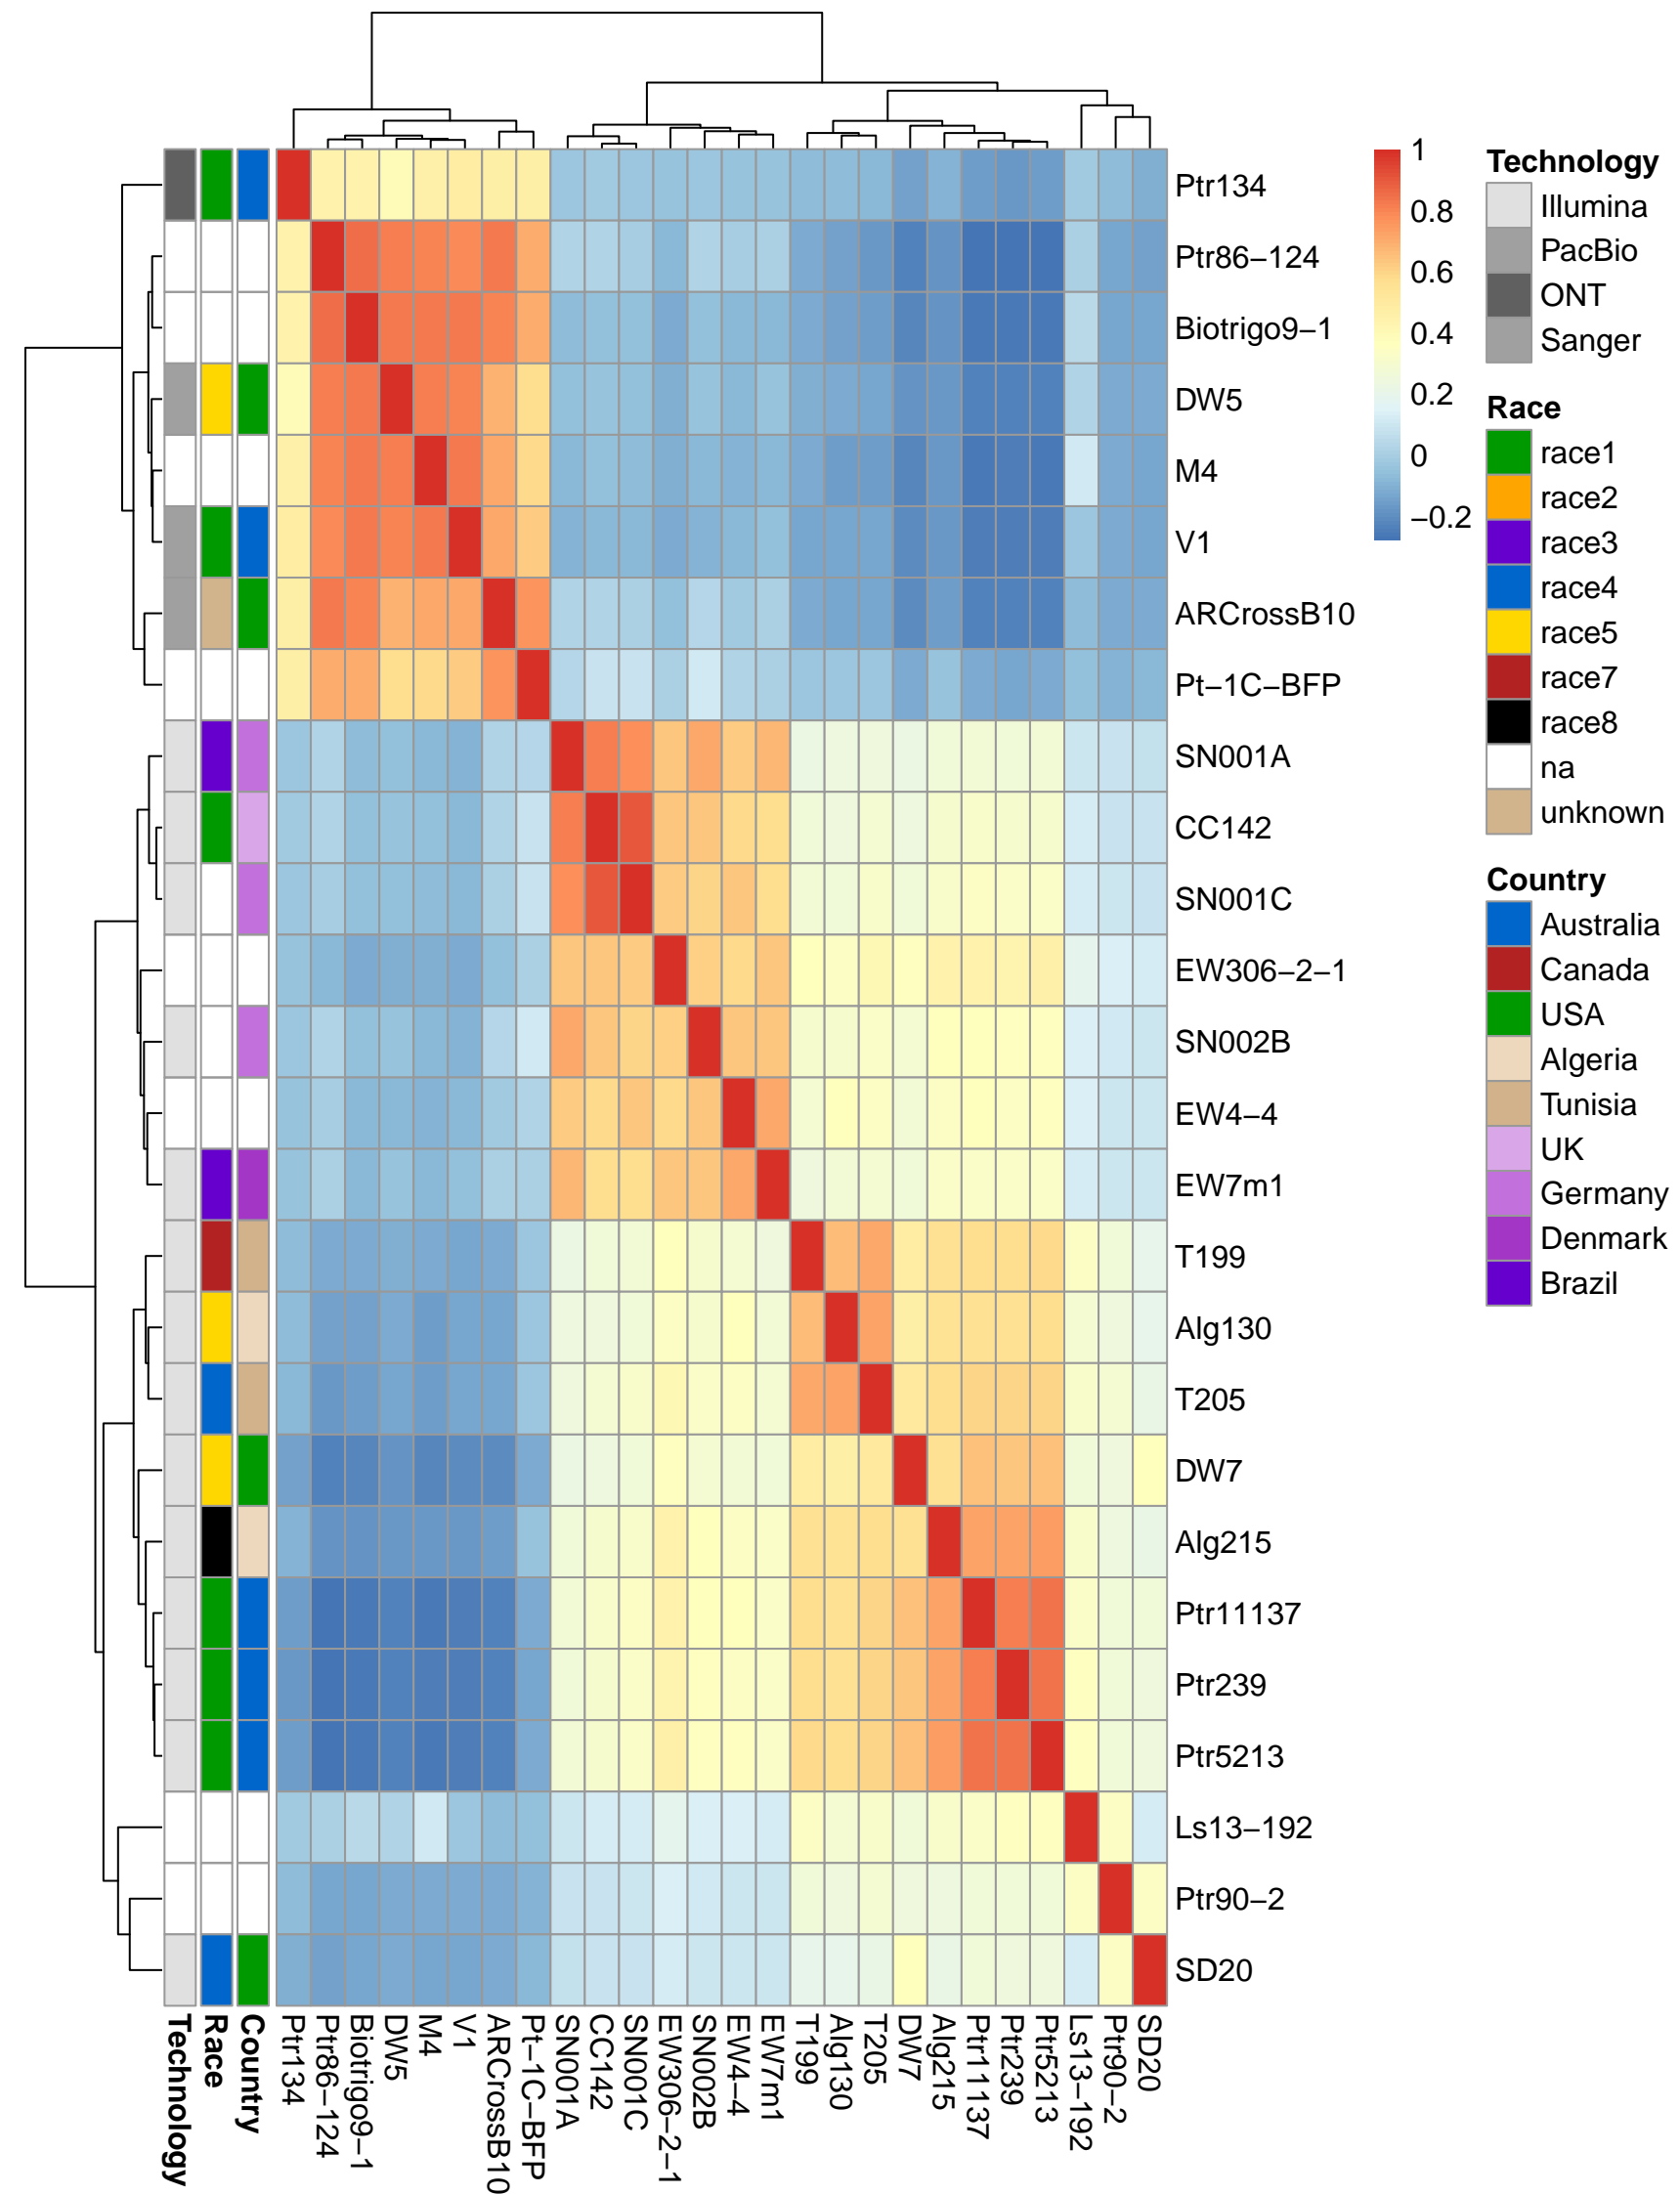

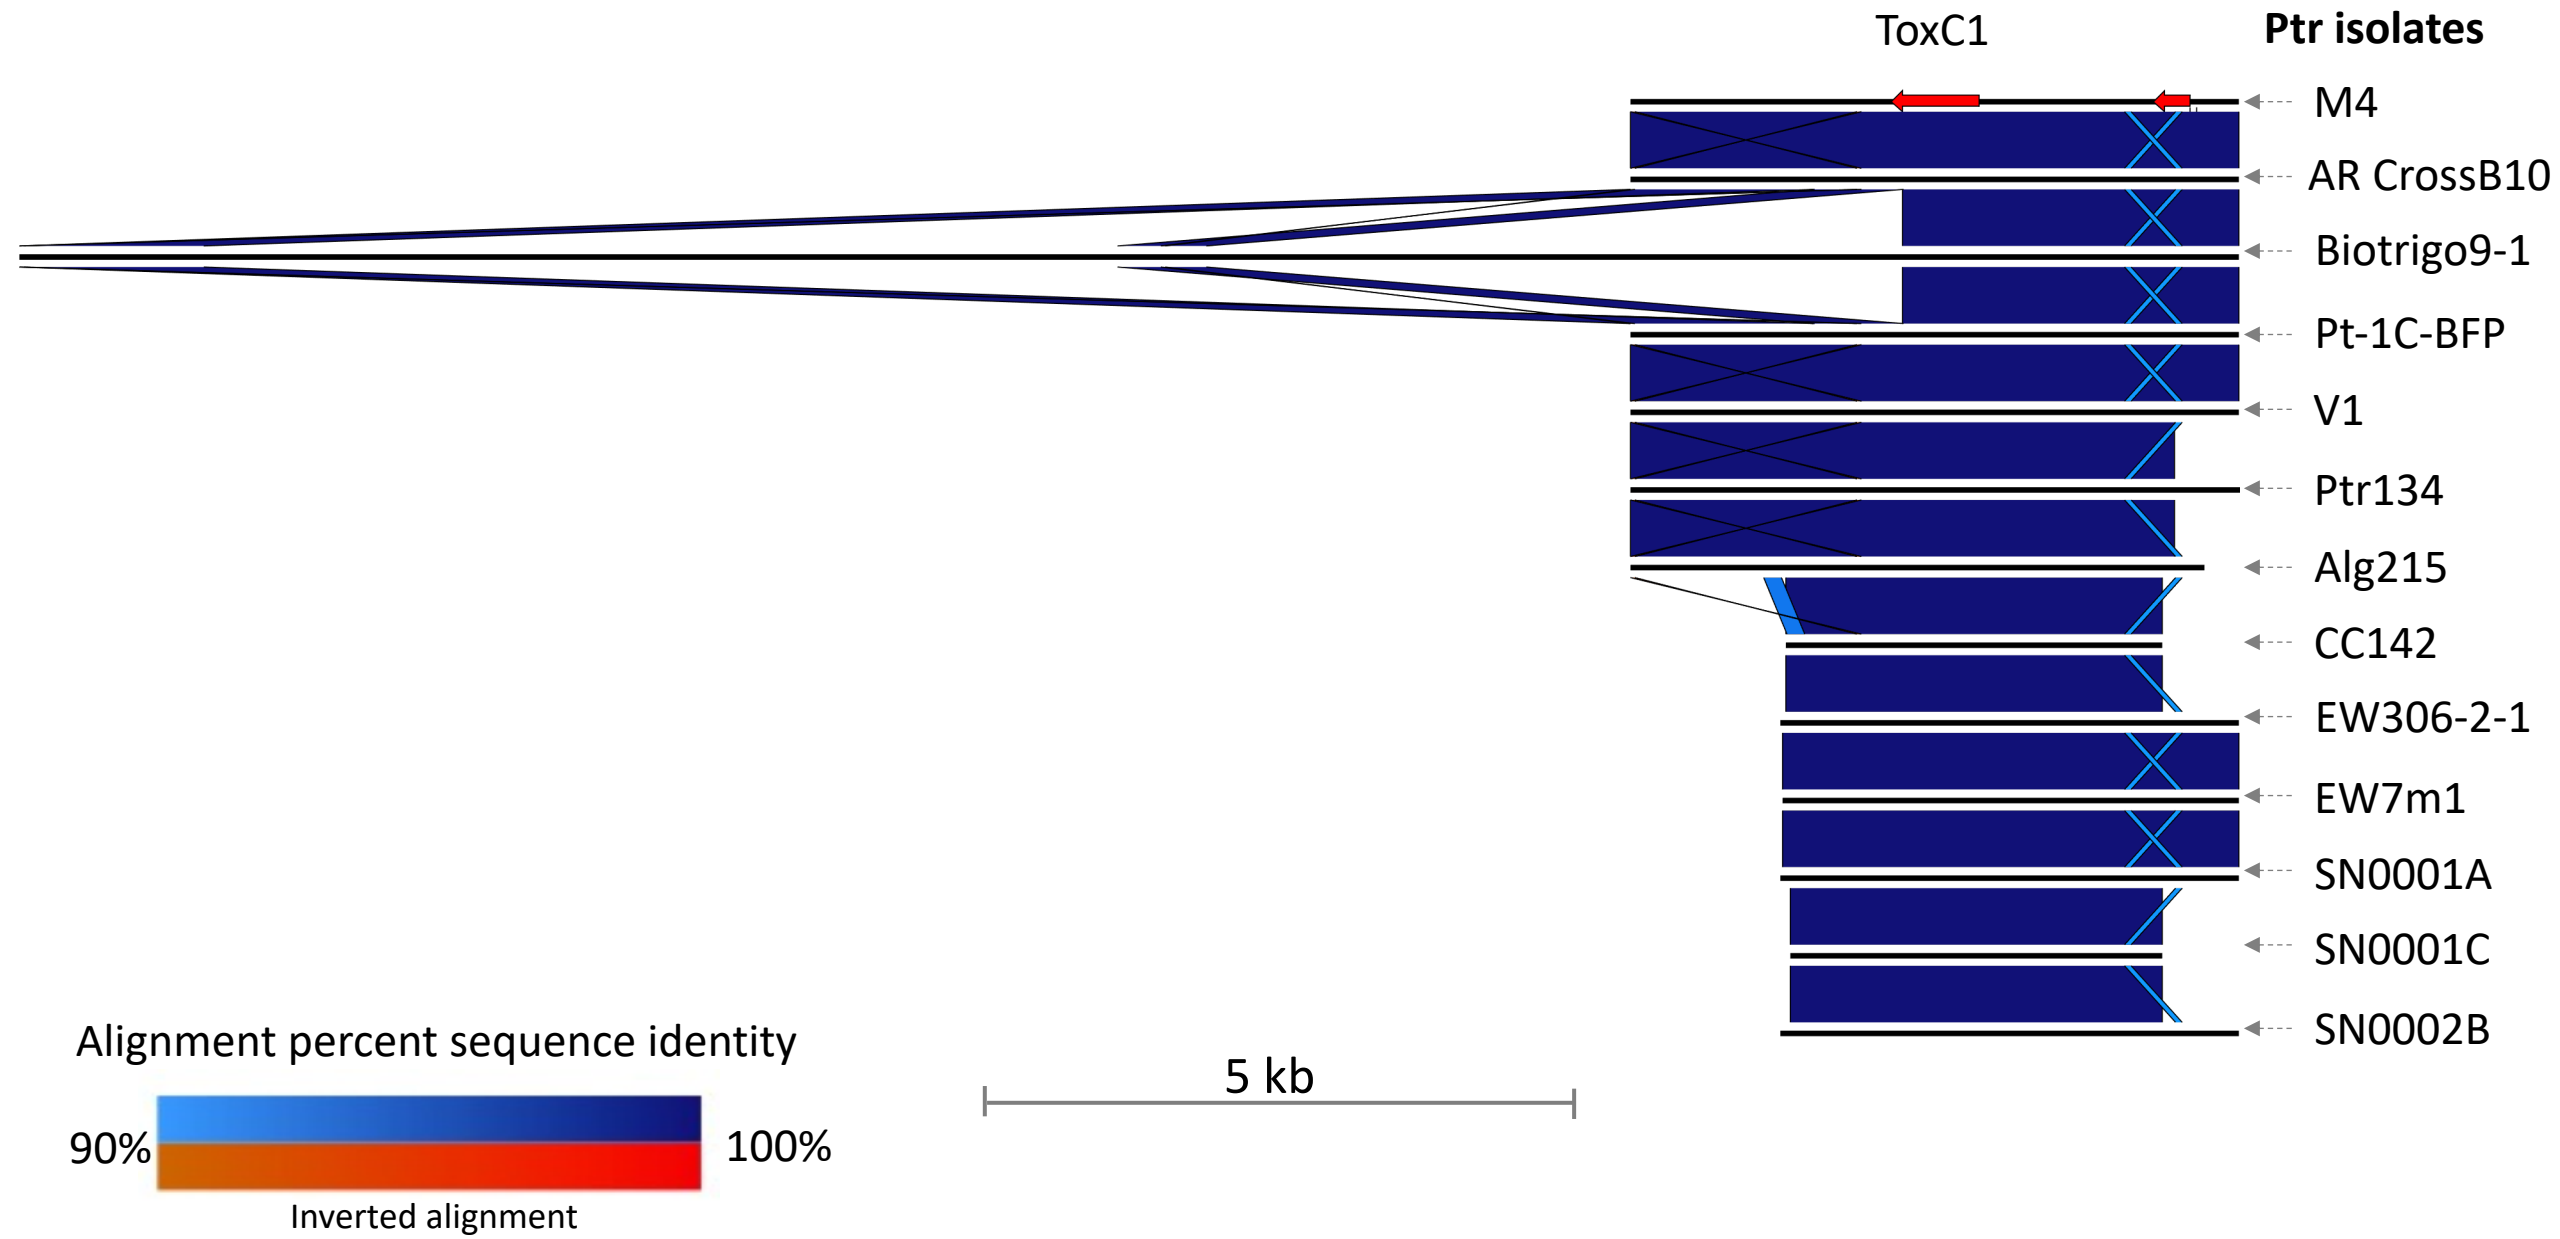

A

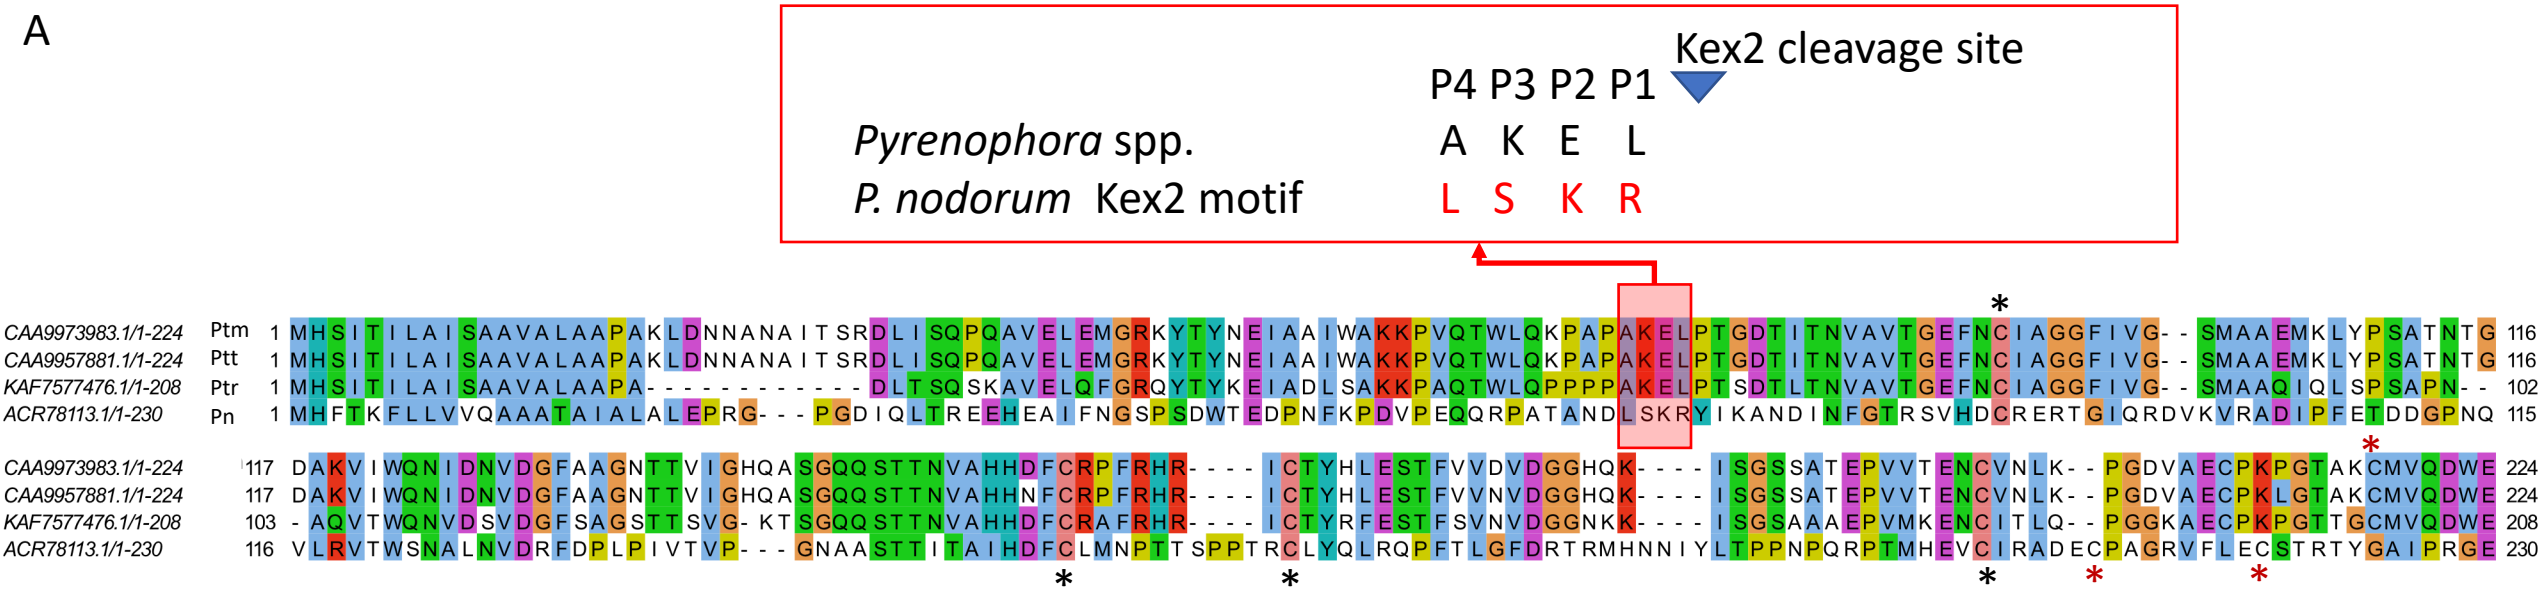

B

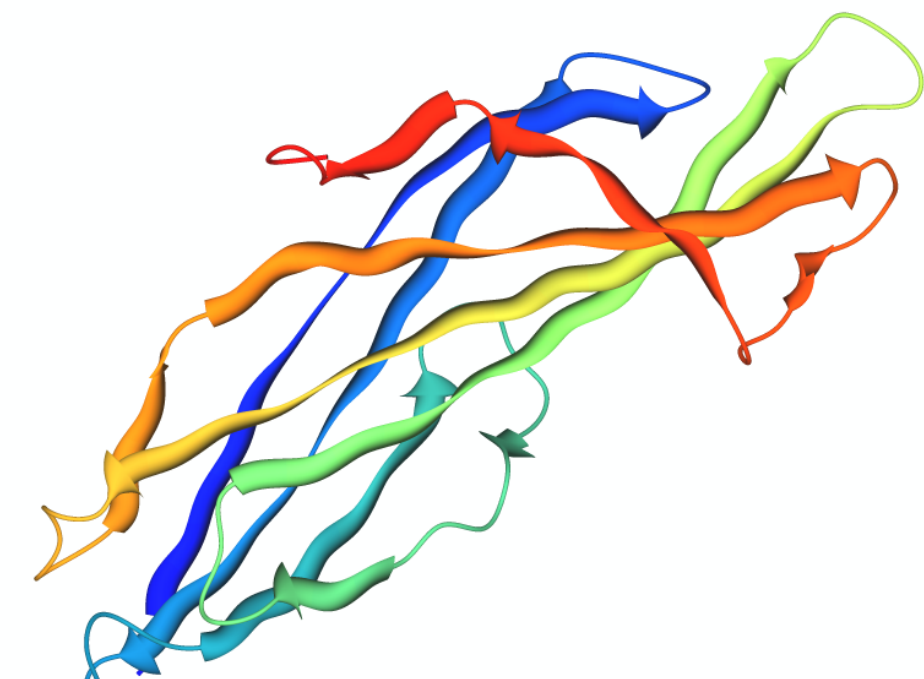

C

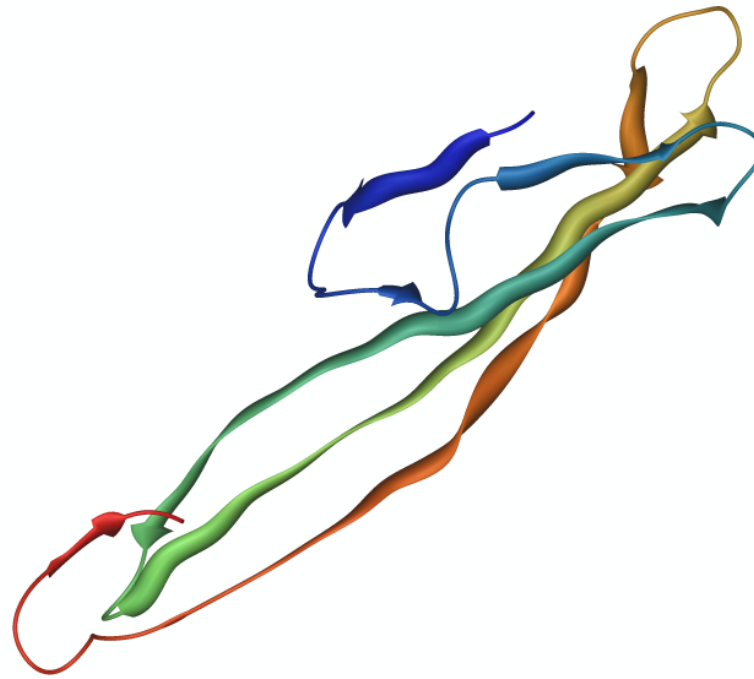

D

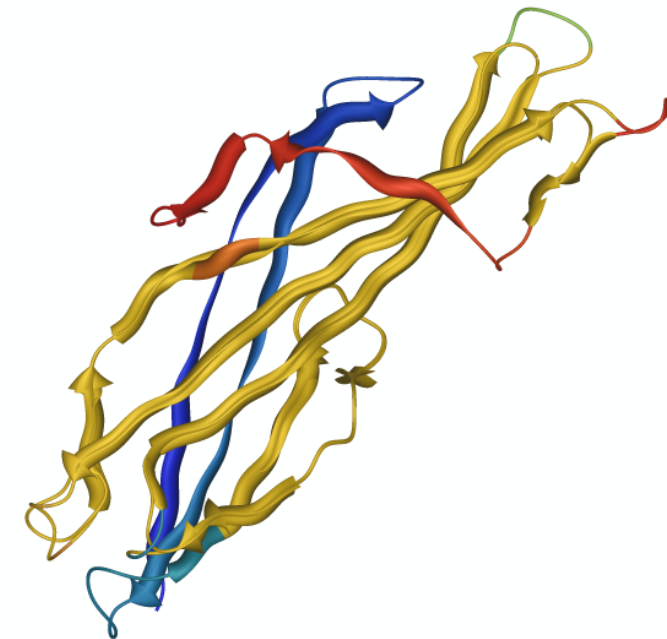

Source: https://www.biorxiv.org/content/10.1101/2022.03.07.482416v1.full.pdf
